# Supplementary material for: Effect of cardiovascular prevention strategies on incident coronary disease hospitalisation rates in Spain; an ecological time series analysis
Source: PubMed Central journal article supplement — BMJ Open. 2014 Feb 15;4(2):e004257. doi: 10.1136/bmjopen-2013-004257 (PMC3927998; doi:10.1136/bmjopen-2013-004257), 2014-02-15
Supplement: bmjopen-2013-004257.draft_revisions.pdf [file bmjopen-2013-004257.draft_revisions.pdf]

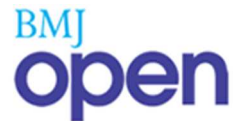

**EFFECT OF CARDIOVASCULAR PREVENTION STRATEGIES ON  
INCIDENT CORONARY DISEASE HOSPITALISATION RATES  
IN SPAIN. AN ECOLOGICAL TIME SERIES ANALYSIS**

|                                 |                                                                                                                                                                                                                                                                                                                        |
|---------------------------------|------------------------------------------------------------------------------------------------------------------------------------------------------------------------------------------------------------------------------------------------------------------------------------------------------------------------|
| Journal:                        | <i>BMJ Open</i>                                                                                                                                                                                                                                                                                                        |
| Manuscript ID:                  | bmjopen-2013-004257                                                                                                                                                                                                                                                                                                    |
| Article Type:                   | Research                                                                                                                                                                                                                                                                                                               |
| Date Submitted by the Author:   | 15-Oct-2013                                                                                                                                                                                                                                                                                                            |
| Complete List of Authors:       | Medrano, María José; Carlos III Institute of Health, National Centre of Epidemiology<br>Alcalde-Cabero, Enrique; Carlos III Institute of Health, National Centre of Epidemiology<br>Ortiz, Cristina; Carlos III Institute of Health, National Centre of Epidemiology<br>Galán, Iñaki; National Centre of Epidemiology, |
| <b>Primary Subject Heading</b>: | Public health                                                                                                                                                                                                                                                                                                          |
| Secondary Subject Heading:      | Cardiovascular medicine, Epidemiology, Health policy                                                                                                                                                                                                                                                                   |
| Keywords:                       | Coronary heart disease < CARDIOLOGY, PUBLIC HEALTH, EPIDEMIOLOGY, PREVENTIVE MEDICINE                                                                                                                                                                                                                                  |
|                                 |                                                                                                                                                                                                                                                                                                                        |

SCHOLARONE™  
Manuscripts

1  
2  
3  
4  
5  
6  
7 **EFFECT OF CARDIOVASCULAR PREVENTION STRATEGIES ON INCIDENT CORONARY DISEASE**  
8 **HOSPITALISATION RATES IN SPAIN. AN ECOLOGICAL TIME SERIES ANALYSIS**  
9

10  
11  
12  
13  
14 **Authors**

15 *María José Medrano, Enrique Alcalde-Cabero, Cristina Ortiz, Iñaki Galán.*  
16  
17  
18  
19

20 **Author affiliations**

21 National Centre for Epidemiology, Carlos III Institute of Health, Madrid, Spain.  
22  
23  
24

25 **Corresponding author**

26 MJ Medrano

27 Centro Nacional de Epidemiología

28 Instituto de Salud Carlos III

29 C/ Sinesio Delgado, 6

30 28029 Madrid, Spain

31 [pmedrano@isciii.es](mailto:pmedrano@isciii.es)

32 Phone: 34918222639

33 Fax: 34913877816  
34  
35  
36  
37  
38  
39  
40  
41  
42  
43

44 **Key words**

45 Coronary heart disease. Prevention. Public Health  
46  
47

48 **Word count:** 3975  
49  
50  
51  
52  
53  
54  
55  
56  
57  
58  
59  
60

**ABSTRACT**

**Objective:** To assess the overall population impact of primary prevention strategies (promotion of healthy lifestyles, prevention of smoking and use of vascular risk drug therapy) of coronary disease in Spain.

**Design:** Ecological time series analysis, 1982 to 2009.

**Setting:** All public and private hospitals in Spain.

**Participants:** General population.

**Outcome:** Incident coronary disease hospitalization as derived from official hospital discharge data.

**Methods:** Annual hospitalisation rates were modelled according to nationwide use of statins, antihypertensive, antidiabetic and antiplatelet drugs, and prevalences of smoking, obesity and overweight. Additive generalised models and mixed Poisson regression models were used for the purpose, taking year as the random-effect variable and adjusting for age, sex, prevalence of vascular risk factors, and hospital beds in intensive and coronary care units.

**Results:** Across 28 years and 671.5 million persons-year of observation, there were 2,986,834 hospitalisations due to coronary disease; of these, 1,441,980 (48.28%) were classified as incident. Hospitalisation rates increased from 1982 to 1996, with an inflection point in 1997 and a subsequent 52% decrease until 2009. Prevalences of smoking, obesity, overweight and use of vascular risk drug therapy were significantly associated with hospitalisation rates ( $p < 0.001$ ): incidence rates ratios (95% CI) for the fourth versus the first quartile were 1.46 (1.42-1.50), 1.80 (1.78-1.83), 1.58 (1.55-1.60) and 0.57 (0.51-0.63) respectively. These variables accounted for 92% of interannual variability.

**Conclusion:** After decades of continuous rises, hospitalisation due to incident IHD has been cut by half, an achievement associated with the decline in smoking and the increase in vascular risk drug therapy. These results indicate that these two primary prevention strategies have been effective at a population level, thanks to an appropriate balance between financial and health goals, something that should be left intact despite the current economic crisis. Future strategies ought to lay special stress on excessive body weight prevention.

## STRENGTHS AND LIMITATIONS OF THIS STUDY

• The study shows that the decline in coronary disease in Spain was associated with the exponential increase in pharmacological treatment of vascular risk, together with the decline in active smoking that followed the strong interventions against tobacco use implemented in mid and late '90s. This decrease in IHD hospitalisation rates could have been even greater, had it not been for the frequency of excessive weight, which not only failed to decline but actually rose.

• The exposure-effect associations found: 1- are of great magnitude; 2- show a strong dose-response relationship; 3-show a correct temporality; 4- are biologically plausible; and 5- are consistent with similar studies in other countries, with trends in other tobacco-related diseases and with the increase in the rates of detection, treatment and control of vascular risk factors in Spain.

• The results are relevant as some of these measures (i.e. broad use of statins in general population) are still controversial. Moreover, the results may substantially affect public health policy, especially in a context of financial crisis.

• This is an ecological study based on health indicators and targeted at the assessment of public health; its results should not be interpreted as outcomes of intervention trials, even though they may nuance the latter insofar as they provide an illustration of their external validity.

## INTRODUCTION

Ischaemic heart disease (IHD) is a severe disease, is lethal in its acute form in 20%-30% of cases [1] – indeed, it is the leading cause of death in men and the second leading cause of death in women in Spain [2]– and is chronically incapacitating in a great proportion of survivors. Its frequency in the Spanish population is high, with population incidence being estimated at 207 and 45/100,000 in men and women respectively, and hospitalisations at 140,000 cases annually.[3] Consequently, this situation became a public health priority and the target of specific health-planning strategies at a national level.[4]

The main vascular risk factors (excessive body weight, smoking habit, hypercholesterolaemia, arterial hypertension and diabetes mellitus) can be modified by changes in lifestyle or therapeutic interventions. In recent years, cardiovascular disease prevention has therefore been the focus of a major collective effort, in which health professionals as well as scientific societies, the pharmaceutical industry and health administrations have all taken part. The pillars of IHD prevention have been prevention of smoking, promotion of healthy lifestyles, and detection, treatment and medical control of arterial hypertension, hypercholesterolaemia, diabetes mellitus and platelet aggregation in high risk patients.[4,5] These strategies have been generally implemented throughout the Spanish National Health System, as a result of recommendations made by the respective health authorities,[4] prevention guidelines drawn up by experts and scientific societies both domestic and international,[5-7] and the development of risk functions which not only enable patients to be stratified according to their individual coronary risk, estimated on the basis of vascular risk factors taken jointly,[8,9] but also serve as a guide when it comes to making therapeutic decisions about controlling vascular risk.

The promotion of healthy habits has specifically centred on diet and physical exercise.[10] Prevalence of obesity and overweight is regarded as an indicator of inadequate diet and physical activity.[4,11] With respect to smoking, the impact of anti-smoking interventions on coronary risk has been comprehensively described at both an individual and a population level. Hence, assessment of epidemiological anti-smoking legislation in a number of countries has shown its effectiveness in terms of IHD mortality and morbidity.[12,13] Lastly, the use of cardiovascular disease prevention drug therapy in healthy persons has demonstrated its effectiveness at an individual level in many clinical trials, though it is not known whether this effectiveness has been reflected at a population level, i.e., its epidemiological impact. Clinical trials are conducted under controlled experimental conditions and the patients included are selected on the basis of strict inclusion and exclusion criteria. Consequently, such studies do not represent the general population and their results may possibly not be seen at a population level (external validity).[14]

To our knowledge, there is no study that has assessed the joint impact of these cardiovascular disease prevention measures on IHD incidence. Epidemiological studies undertaken in different countries,[15-20] including Spain,[21] have linked the decrease in cardiovascular and ischaemic heart disease mortality to the decline in population levels of vascular risk factors. In Spain, 50% of the reduction in coronary mortality is estimated to be due to changes in risk factors, essentially total cholesterol (close on 31% of the fall in

1  
2  
3 mortality) and systolic blood pressure (15%).[21] Most of these studies have, however, been based on  
4 IMPACT methodology,[17,18] which was designed to assess changes in mortality but has not been adapted  
5 to the task of assessing morbidity. Recent studies in the USA,[22,23] Italy [24] and Australia [25] have  
6 reported a decrease in IHD-related hospital morbidity, which was linked to anti-smoking legislation and the  
7 use of cardioprotective medication, though these associations were not statistically proved. Lastly, a recent  
8 population-based observational study in Israel [26] assessed the effect of continued use of statins on the  
9 incidence of acute infarction and coronary revascularisation but did not consider the effect of use of  
10 antihypertensive, antiplatelet or antidiabetic drugs.  
11  
12  
13

14  
15 Accordingly, the aim of this study was to describe the time trend in hospital incident-IHD-related morbidity  
16 rates and assess the impact of smoking prevention, promotion of healthy lifestyles and the use of  
17 cardiovascular disease prevention drug therapy, using the following as indicators: population prevalence of  
18 smoking; prevalence of obesity and overweight; and use of statins and antihypertensive, antiplatelet and  
19 antidiabetic drugs.  
20  
21  
22  
23  
24

## 25 METHODS

26  
27  
28 We conducted an epidemiological assessment study into the impact of preventive measures using  
29 regression analysis and time-series modelling and, for study purposes, including the total Spanish population  
30 over 29 years of age. The period considered in the description of the time series was 1982 to 2009, avoiding  
31 the years preceding the entry into force of the International Classification of Diseases, 9<sup>th</sup> Revision, Clinical  
32 Modification (ICD-9-CM). In the analysis of related factors, the series was restricted to the period 1996–2006,  
33 since this was the period for which data on all the explanatory variables were available.  
34  
35  
36  
37

### 38 1- Principal and secondary variables. Data-sources.

39 The outcome variable was frequency of hospitalisation due to incident IHD (ICD-9-CM codes 410-414, with  
40 four digits), expressed in the form of annual age-adjusted rates according to the Standard European  
41 Population. Data on hospital discharges due to this cause were drawn from anonymised MBDS microfiches  
42 (Minimum Basic Data Set/*Conjunto Mínimo Básico de Datos*, the official nation-wide administrative and  
43 statistical database which includes clinical and demographic data on every hospital discharge, obtained from  
44 the pertinent medical records), and were completed with a patient discharge sample from some private  
45 hospitals that were not included in the MBDS. The fiches were supplied by the National Statistics Institute  
46 (NSI) (*Instituto Nacional de Estadística*) under a data loan agreement containing an undertaking of  
47 confidentiality and respect for statistical secrecy. Population data for calculating the rates for each year, sex  
48 and age group were obtained from NSI intercensal estimates.  
49  
50  
51  
52  
53

54 An incident event was defined as that in which the following two conditions were fulfilled: a) diagnosis at  
55 discharge of acute IHD, acute myocardial infarction, intermediate coronary syndrome (unstable angina) or  
56 angina pectoris (ICD 410, 411 or 413); and, b) first admission due to IHD, as shown by a check for duplicate  
57  
58  
59  
60

1  
2  
3 entries based on the fields, "sex", "date of birth" and "province of residence". Events for which control for  
4 duplicates could not be performed for lack of any record of the patient's complete date of birth (n= 91,176,  
5 3.1%), were excluded.  
6  
7

8 The method used to control for duplicates was validated by comparing the results against data on 30,205  
9 hospitalisations in eight cities for which patient identification codes were available, yielding a sensitivity of  
10 97.88% and specificity of 88.73. The distribution by age, sex and diagnostic category of this validation  
11 sample did not differ from that of the study population.  
12  
13

14  
15 The variables considered as potentially explanatory of the trend in IHD hospitalisation rates in the population  
16 were:  
17

- 18 - use of statins (atorvastatin, cerivastatin, fluvastatin, lovastatin, pravastatin and simvastatin);
- 19 - use of antihypertensive drugs (angiotensin II receptor antagonists, angiotensin-converting enzyme  
20 inhibitors, betablockers, diuretics, calcium channel blockers and others);
- 21 - use of platelet aggregation inhibitors (aspirin, carbasalate, clopidogrel, dipyridamol, citazol,  
22 ticlopidine and triflusal);
- 23 - use of antidiabetic drugs (insulins, biguanides, sulphonylureas, alpha-glucosidase inhibitors,  
24 thiazolidinediones and combinations of these).  
25  
26

27 The use of these drugs was expressed in Defined Daily Doses (DDDs) per 1,000 inhabitants per day  
28 (DHDs), for the period 1996-2006. These data were drawn from reports issued by the Spanish  
29 Medications & Health Products Agency on the basis of data on packages dispensed under and  
30 charged to the National Health System.[27] The methodology used is described in detail in these  
31 publications. DHDs divided by 10 were introduced into the models, with the estimators having to be  
32 interpreted as the effect for every increase of 10 units in the DHD.  
33  
34

- 35 - prevalence, with a breakdown by year, sex and age, of smoking, overweight, obesity, arterial  
36 hypertension, hypercholesterolaemia and diabetes mellitus obtained from self-report data in the  
37 1987,1993, 1995, 1997, 2001, 2003 and 2006 National Health Surveys,[28] with data for the  
38 intermediate years being estimated by means of linear interpolation of data for the pivotal years.  
39  
40
- 41 - Number of physically available hospital beds in intensive care and coronary care units per 1,000  
42 inhabitants.[28]  
43  
44  
45

## 46 **2- Data-analysis**

47 Weightings specified by the NSI were used for the calculation of the number of cases. Age-adjusted incident  
48 IHD hospitalisation rates (Standard European Population) were calculated for each year and sex. The rates  
49 were depicted graphically, as were the frequency measures of the remaining explanatory variables for each  
50 year.  
51  
52  
53

54  
55 The effect of the explanatory variables on incident IHD morbidity was estimated on the basis of incidence  
56 rates ratios (IRRs) derived from mixed Poisson regression models of fixed and random effects, with year  
57  
58

1  
2  
3 being introduced as the random-effect variable. This approach enables one to control for both temporal  
4 autocorrelation and overdispersion, measure interannual variability explained by the preventive measures,  
5 and minimise the risk of residual confounding. The dependent variable was the number of incident  
6 hospitalisations in each sex and age stratum, and the national population figure of each stratum was  
7 introduced as the exposed population. The explanatory variables were sequentially introduced, successively  
8 obtaining age- and sex-adjusted estimators and multivariate estimators. We considered the concurrent effect  
9 across time of the explanatory variables and hospitalisation, plus the effect with lags of one, two and three  
10 years, so as to take into account the possible latency between exposure and its effect, and assess the  
11 temporality of the associations.  
12  
13  
14

15  
16  
17 The effect of drug therapy for control of vascular risk was analysed for each type of drug (statins, and  
18 antihypertensive, antiplatelet and antidiabetic drugs), both individually and jointly, using the variable "drug  
19 use for control of vascular risk" obtained by adding together the respective usages of each type to avoid the  
20 strong collinearity that characterises the consumption of such drugs (correlation coefficients of 0.97 to 0.99).  
21 The explanatory variables categorised in quartiles were included in the models for dose-response analysis.  
22 These models were used to measure the interannual variability explained by the variables, calculated as 1  
23 minus the ratio between the variance of the random term in the complete model and the variance of the  
24 random term in the model without explanatory variables.  
25  
26  
27  
28

29  
30 Lastly, the incidence time series was analysed and plotted graphically with the aid of non-parametric  
31 generalised additive models (GAMs) implemented in the mgcv library of the R statistical package version  
32 2.15.0 (2012-03-30).[29] The rates were modelled and smoothed by reference to time, and the smoothed  
33 age- and sex-adjusted series were depicted graphically. The explanatory variables were subsequently  
34 included in these models.  
35  
36  
37  
38

## 39 RESULTS

40  
41 Across the 28 years and 671.5 million persons-year of observation, there were 2,986,834 hospitalisations in  
42 Spain due to IHD; and of these, 1,441,980 (66.7% men and 33.3% women), accounting for 48.28% of the  
43 total, were classified as incident. Mean age at admission was  $65.9 \pm 12.8$  years, with a higher frequency in  
44 the 60- to 74-year age group (41.9%). Diagnosis at discharge was acute infarction in 55%, unstable angina  
45 in 14.7%, and stable angina in 30.3% of cases. Women's mean age was 5 years older ( $p < 0.001$ ), and the  
46 over-74-year age group was far more frequent among women than among men (data not shown in tables).  
47  
48  
49

50  
51 The annual age-adjusted incident IHD hospitalisation rates per 100,000, which are depicted graphically in  
52 Figure 1, show a rise from 1982 to 1996, a sharp inflection in 1997 and a subsequent cumulative decrease of  
53 52.0% until 2009 (53.5% and 49.6% in men and women respectively). The decline was constant throughout  
54 the period, save for a slight increase in 2000, coinciding with the change in the definition of ischaemic heart  
55 disease. The distribution by sex of the incidence rates changed across the study period, with a decrease in  
56  
57  
58  
59  
60



1  
2  
3 the male/female ratio from 3.3 to 2.4.  
4

5  
6 Of the total study period (1982-2009), data on indicators of cardiovascular disease prevention (prevalence of  
7 smoking, prevalence of obesity and overweight, and use of drug therapy for control of vascular risk) were  
8 available for the period 1996-2006. These years witnessed a rise in the use of statins (948.9%) and  
9 antihypertensive (95.4%), antiplatelet (105%) and antidiabetic drugs (142%), and a decline in smoking  
10 prevalence (6.8% in women and 23.8% in men). Prevalence of obesity increased by 40% (Figure 1).  
11

12  
13 Consumption of statins and antihypertensive, antiplatelet and antidiabetic drugs, individually considered,  
14 displayed an inverse and statistically significant relationship with incident IHD hospitalisation rates in models  
15 adjusted for age, sex and prevalences of smoking, obesity and overweight (Table 1), and this association  
16 became progressively greater when growing lags were taken into account. Similarly, the use of drugs  
17 considered jointly was inversely associated (IRR 0.97, 95% CI 0.97-0.98) with IHD incidence. The greater  
18 magnitude of the effect of drug use when considered individually rather than jointly should not be construed  
19 as a discrepancy: instead, this is attributable both to the difference in scale, and to drug associations and the  
20 lack of adjustment among the individual drug usages due to collinearity. In contrast, prevalence of smoking  
21 and that of obesity and overweight were both positively associated with incidence of hospitalisation due to  
22 IHD. In the models in which adjustment was additionally made for prevalences of arterial hypertension,  
23 hypercholesterolaemia and diabetes mellitus, and for the number of physically available beds in intensive  
24 and coronary care units, the above associations were not substantially modified, i.e., the effect of frequency  
25 of smoking was not modified, the effect of frequency of obesity and overweight was slightly attenuated, and  
26 the inverse association with drug use was slightly accentuated, both when the respective types of drugs were  
27 considered individually and when they were considered jointly.  
28  
29

30  
31 Furthermore, these associations displayed a statistically significant dose-response relationship in the models  
32 adjusted for sex, age, the variables in the table, and year as a random-effect variable (Table 2): whereas the  
33 IRR of smoking prevalence in the fourth versus the first quartile was 1.46 (95%CI 1.42-1.50) and the IRRs for  
34 prevalence of obesity and overweight were 1.80 (1.78-1.83) and 1.58 (1.55-1.60) respectively, the IRR for  
35 cardiovascular disease prevention drug therapy was 0.57 (0.51-0.63). The linear trend was statistically  
36 significant for all four variables. The protective effect of cardiovascular disease prevention drug therapy was  
37 slightly attenuated when the growing lags between exposure and effect were taken into account (IRR lag 0=  
38 0.57 (0.51-0.63) / IRR lag 3=0.61 (0.57-0.66)). Similarly, while the association with prevalence of overweight  
39 was attenuated over time, the association was not modified when the growing lags between exposure and  
40 effect for prevalences of obesity and smoking habit were taken into account.  
41  
42

43  
44 The interannual variability in hospitalisation rates explained by the models considering the four variables  
45 simultaneously (continuous scale) and adjusting for age and sex was: 92% for no lag between exposure and  
46 effect; 95% for a lag of one year; 97% for a lag of two years; and 94% for a lag of three years (data not  
47 shown in tables).  
48  
49

Table 1. Effect of prevalence of smoking habit, obesity, overweight and use of cardiovascular disease prevention drug therapy on incident ischaemic heart disease hospitalisation rates on annual incident ischaemic heart disease hospitalisation rates 1996-2006. Models for exposure-effect lags of 0, 1, 2 and 3 years.

|                                                                                   | Lag0 |             | Lag1 |             | Lag2 |             | Lag3 |             |
|-----------------------------------------------------------------------------------|------|-------------|------|-------------|------|-------------|------|-------------|
|                                                                                   | IRR  | 95%CI       | IRR  | 95%CI       | IRR  | 95%CI       | IRR  | 95%CI       |
| <i>1. Adjustment for age, sex, year (random variable) and specified variables</i> |      |             |      |             |      |             |      |             |
| % Smokers                                                                         | 1.02 | (1.01-1.02) | 1.02 | (1.02-1.02) | 1.02 | (1.02-1.02) | 1.02 | (1.02-1.02) |
| % Obesity                                                                         | 1.05 | (1.04-1.05) | 1.05 | (1.05-1.05) | 1.05 | (1.05-1.05) | 1.06 | (1.05-1.06) |
| % Overweight                                                                      | 1.04 | (1.04-1.04) | 1.04 | (1.04-1.04) | 1.03 | (1.03-1.04) | 1.03 | (1.03-1.03) |
| Drug use (x10 DHDs*)¶                                                             | 0.97 | (0.97-0.98) | 0.97 | (0.97-0.97) | 0.97 | (0.97-0.97) | 0.97 | (0.96-0.97) |
| Statins¶                                                                          | 0.92 | (0.91-0.93) | 0.91 | (0.90-0.92) | 0.90 | (0.88-0.91) | 0.87 | (0.85-0.90) |
| Antihypertensive drugs¶                                                           | 0.95 | (0.94-0.95) | 0.94 | (0.94-0.95) | 0.94 | (0.94-0.94) | 0.93 | (0.93-0.94) |
| Antidiabetic drugs¶                                                               | 0.81 | (0.79-0.83) | 0.81 | (0.79-0.83) | 0.80 | (0.79-0.81) | 0.78 | (0.77-0.79) |
| Antiplatelet drugs¶                                                               | 0.77 | (0.76-0.79) | 0.77 | (0.75-0.79) | 0.75 | (0.74-0.77) | 0.72 | (0.70-0.74) |
| <i>2. Multivariate adjustment:**</i>                                              |      |             |      |             |      |             |      |             |
| % Smokers                                                                         | 1.01 | (1.01-1.01) | 1.02 | (1.01-1.02) | 1.02 | (1.02-1.02) | 1.02 | (1.02-1.02) |
| % Obesity                                                                         | 1.03 | (1.03-1.03) | 1.03 | (1.03-1.04) | 1.03 | (1.03-1.04) | 1.03 | (1.03-1.04) |
| % Overweight                                                                      | 1.03 | (1.03-1.03) | 1.03 | (1.03-1.03) | 1.03 | (1.02-1.03) | 1.03 | (1.03-1.03) |
| Drug use (10 DHDs*)¶                                                              | 0.96 | (0.96-0.97) | 0.96 | (0.96-0.97) | 0.96 | (0.96-0.96) | 0.96 | (0.96-0.96) |
| Statins¶                                                                          | 0.90 | (0.89-0.91) | 0.89 | (0.88-0.90) | 0.87 | (0.86-0.89) | 0.85 | (0.83-0.87) |
| Antihypertensive drugs¶                                                           | 0.92 | (0.91-0.93) | 0.92 | (0.91-0.93) | 0.92 | (0.92-0.93) | 0.92 | (0.92-0.93) |
| Antidiabetic drugs¶                                                               | 0.73 | (0.68-0.77) | 0.74 | (0.71-0.77) | 0.75 | (0.73-0.77) | 0.75 | (0.74-0.75) |
| Antiplatelet drugs¶                                                               | 0.70 | (0.66-0.73) | 0.70 | (0.67-0.73) | 0.70 | (0.68-0.71) | 0.68 | (0.67-0.70) |

\* DHDs: No. of Defined Daily Doses per 1000 inhabitants per day.\*\* Adjusted for variables specified in the table plus age, sex, year of discharge as a random-effect variable, prevalence (%) of arterial hypertension, prevalence (%) of hypercholesterolaemia, prevalence (%) of mellitus diabetes, and number of hospital beds in intensive care and coronary care units.¶ Not adjusted among themselves because collinearity.

Table 2. Dose-response analysis of the effect of prevalence of smoking habit, obesity, overweight and use of cardiovascular disease prevention drug therapy on incident ischaemic heart disease hospitalisation rates. Models for exposure-effect lags of 0, 1, 2 and 3 years.

|                          | Lag0  |             | Lag1  |             | Lag2  |             | Lag3  |             |
|--------------------------|-------|-------------|-------|-------------|-------|-------------|-------|-------------|
|                          | IRR** | 95%CI       | IRR** | 95%CI       | IRR** | 95%CI       | IRR** | 95%CI       |
| % Smokers                |       |             |       |             |       |             |       |             |
| 1 <sup>st</sup> quartile |       | 1.00        |       | 1.00        |       | 1.00        |       | 1.00        |
| 2 <sup>nd</sup> quartile | 0.92  | (0.91-0.93) | 0.91  | (0.90-0.93) | 0.92  | (0.91-0.94) | 0.93  | (0.91-0.94) |
| 3 <sup>rd</sup> quartile | 1.23  | (1.21-1.25) | 1.21  | (1.19-1.23) | 1.20  | (1.18-1.22) | 1.18  | (1.15-1.20) |
| 4 <sup>th</sup> quartile | 1.46  | (1.42-1.50) | 1.48  | (1.44-1.52) | 1.50  | (1.46-1.55) | 1.49  | (1.45-1.54) |
| <i>P trend</i>           |       | <0.001      |       | <.0001      |       | < 0.001     |       | < 0.001     |
| % Obesity                |       |             |       |             |       |             |       |             |
| 1 <sup>st</sup> quartile |       | 1.00        |       | 1.00        |       | 1.00        |       | 1.00        |
| 2 <sup>nd</sup> quartile | 1.46  | (1.44-1.47) | 1.45  | (1.43-1.46) | 1.34  | (1.33-1.36) | 1.32  | (1.30-1.33) |
| 3 <sup>rd</sup> quartile | 1.71  | (1.69-1.73) | 1.65  | (1.63-1.67) | 1.53  | (1.51-1.55) | 1.48  | (1.46-1.50) |
| 4 <sup>th</sup> quartile | 1.80  | (1.78-1.83) | 1.82  | (1.79-1.85) | 1.75  | (1.73-1.79) | 1.86  | (1.78-1.90) |
| <i>P trend</i>           |       | <0.001      |       | <0.001      |       | <0.001      |       | <0.001      |
| % Overweight             |       |             |       |             |       |             |       |             |
| 1 <sup>st</sup> quartile |       | 1.00        |       | 1.00        |       | 1.00        |       | 1.00        |
| 2 <sup>nd</sup> quartile | 1.23  | (1.22-1.24) | 1.21  | (1.19-1.22) | 1.14  | (1.13-1.16) | 1.06  | (1.05-1.08) |
| 3 <sup>rd</sup> quartile | 1.41  | (1.39-1.43) | 1.35  | (1.33-1.37) | 1.30  | (1.28-1.31) | 1.22  | (1.20-1.24) |
| 4 <sup>th</sup> quartile | 1.58  | (1.55-1.60) | 1.50  | (1.47-1.52) | 1.43  | (1.41-1.45) | 1.33  | (1.31-1.36) |
| <i>P trend</i>           |       | <0.001      |       | <0.001      |       | <0.001      |       | <0.001      |
| Use of drugs (x10 DHDs*) |       |             |       |             |       |             |       |             |
| 1 <sup>st</sup> quartile |       | 1.00        |       | 1.00        |       | 1.00        |       | 1.00        |
| 2 <sup>nd</sup> quartile | 0.85  | (0.76-0.93) | 0.87  | (0.80-0.94) | 0.83  | (0.78-0.88) | 0.84  | (0.78-0.90) |
| 3 <sup>rd</sup> quartile | 0.71  | (0.65-0.79) | 0.73  | (0.68-0.79) | 0.71  | (0.67-0.75) | 0.70  | (0.65-0.75) |
| 4 <sup>th</sup> quartile | 0.57  | (0.51-0.63) | 0.59  | (0.55-0.64) | 0.62  | (0.58-0.66) | 0.61  | (0.57-0.66) |
| <i>P trend</i>           |       | < 0.001     |       | < 0.001     |       | < 0.001     |       | < 0.001     |

\* DHDs: No. of Defined Daily Doses per 1000 inhabitants per day. \*\* IRR adjusted for variables specified in the table plus age, sex and year of discharge as a random-effect variable. Four independent models, each including the variable of interest on a categorical scale adjusted for the others on a continuous scale.

1  
2  
3 Lastly, the downward trend in the annual age-and sex-adjusted incidence rates (Figure 2, left plot)  
4 disappeared after additionally adjusting for the four explanatory variables (Figure 2, right plot), which shows  
5 that the decrease was due to the effect of these same variables. From 2004 onwards, however, the declining  
6 trend remained in evidence even after adjustment was made for use of preventive drug therapy and  
7 prevalence of smoking, obesity and overweight.  
8  
9

## 10 11 12 **DISCUSSION**

13  
14  
15 The results show that, after decades of continuous rises, hospitalisation due to incident IHD in the Spanish  
16 adult population fell after 1997, a drop that was associated with the decline in smoking and, in equal  
17 measure, with the increase in pharmacological treatment of vascular risk. This decrease in IHD  
18 hospitalisation rates could have been even greater, had it not been for the frequency of excessive weight,  
19 which not only failed to decline but actually rose. Overall, the factors analysed accounted for over 90% of the  
20 decrease in incident IHD hospitalisation rates. The decline occurred despite the increased sensitivity of  
21 diagnostic tests and the ensuing change in the IHD-definition criteria.[30]  
22  
23  
24  
25  
26  
27

28 The accuracy of the results is reinforced because the associations show a strong dose-response relationship  
29 and a correct temporality, with the effect being maintained in response to growing lags between exposure  
30 and disease. The associations found are biologically plausible, since both the role of smoking in the  
31 aetiology of coronary disease and the effect of drugs on vascular risk have been sufficiently proved by *in*  
32 *vitro* studies and clinical trials. Lastly, the results are in line with: what has been published with respect to the  
33 decreases in IHD mortality [15-21] and hospital morbidity recorded in other countries;[22-26] the decline in  
34 Spain in the incidence of smoking-related diseases such as asthma and lung cancer;[28] the reduction in  
35 mean population levels of serum cholesterol and systolic blood pressure;[21] and the increase in the rates of  
36 detection, treatment and control of vascular risk as documented by cross-sectional studies on the Spanish  
37 population.[31]  
38  
39  
40  
41  
42  
43

44 The study shows the success of the smoking control strategies implemented in the 1990s,[32] based on  
45 legislative measures targeted at restricting the sale, raising the price and placing limitations on the  
46 advertising of cigarettes, information programmes about smoking-related risks, and anti-smoking campaigns.  
47 These measures were followed by a considerable decline in the frequency of active smoking, principally  
48 among light and moderate smokers.[28] The most recent legislative measures, aimed at preventing passive  
49 smoking, have not achieved such a marked decrease in active smoking prevalence. Our results suggest,  
50 however, that part of the decline in IHD incidence in the lattermost years of the study is not accounted for by  
51 the factors analysed, indicating, in turn, that this may be due to the decline in passive smoking resulting, not  
52 only from the cumulative reduction in active smoking itself in the years preceding the entry into force of these  
53  
54  
55  
56  
57  
58  
59  
60

1  
2  
3 measures, but also from the direct impact of the first Anti-smoking Act. Different studies undertaken in Spain  
4 [33,34] and other countries [12,13] have shown the effect on IHD mortality and morbidity of a legal ban on  
5 smoking in the workplace.  
6

7  
8 The results support a primary prevention strategy based on pharmacological control of vascular risk.  
9 Evidence of the effectiveness of this strategy at a population level, which implies the mass use of medication,  
10 is especially important in an adverse economic context, and more so when the use of drugs for  
11 cardiovascular disease prevention in healthy persons has been the subject of controversy.[35] Specifically, in  
12 the case of the various statins, meta-analyses of clinical trials have yielded contradictory results,[36-40] with  
13 some authors being of the opinion that it is preferable to change the lifestyles of these patients. While this  
14 study does not purport to assess the clinical effect of these drugs, its results nonetheless show a statistically  
15 significant decrease in the age- and sex-adjusted hospitalisation rate associated with the use of both statins  
16 and hypertensive, antiplatelet and antidiabetic drugs. Although the presence of strong collinearity ruled out  
17 any analysis of the independent effect of each of these drugs with adjustment for remainder, their use  
18 considered jointly *did* show a strong protective effect, regardless of the effect of sex, age, smoking  
19 prevalence and excessive weight, a finding in line with the consideration that vascular risk is multifactorial  
20 and cannot be corrected by controlling the respective risk factors in isolation.[7] The appropriate balance  
21 between economic and health objectives by policies aimed at reducing pharmaceutical costs, such as those  
22 fostering the use of generic drugs or a gradual reduction in profit margins for producers and distributors,[41]  
23 have been decisive factors in this public health success. Even so, recent studies reveal that there is still  
24 much room for improvement in the detection, treatment and control of vascular risk.[31]  
25  
26  
27  
28  
29  
30  
31  
32  
33

34 In contrast with smoking and control of vascular risk, prevalences of overweight and obesity, positively  
35 associated with incident IHD hospitalisation rates, increased across the study period, indicating that  
36 prevention based on promoting a healthy diet and physical exercise and changing obesogenic lifestyles is  
37 proving inadequate or ineffective, probably because the effects of these policies will only be seen in the  
38 longer term.[10] Without ignoring smoking prevention or therapeutic control of vascular risk, our results  
39 indicate that, from a public health stance, treatment and prevention of excess weight should be made a  
40 priority. Community interventions aimed at changing the prevalence of obesity and sedentarism are  
41 multidisciplinary, going beyond the strict scope of health care and involving multiple levels, such as  
42 education, the food sector, town planning and administration, provision of sports facilities, transport policy,  
43 etc.[11] Moreover, with the change of lifestyles many treatments could be avoided -and in this respect our  
44 sympathies are with those who advocate this- but, until such a time as a cost-effective means of changing  
45 the prevalence of obesity and sedentarism becomes available, the use of vascular prevention drug therapy is  
46 an inevitable strategy.  
47  
48  
49  
50  
51  
52

53 In the correct interpretation of the results of this study, some limitations must be borne in mind. Firstly, this  
54 study was based on health indicators and targeted at the assessment of public health; its results should not  
55 be extrapolated to the clinical sphere, i.e., to the clinical management of individual patients, and are thus not  
56  
57  
58  
59  
60

1  
2  
3 interpretable as outcomes of clinical or intervention trials, even though they may nuance the latter insofar as  
4 they provide an illustration of their external validity. Secondly, the results are exclusively applicable to cases  
5 of hospitalised incident IHD; having said this, however, the possibility that the decline in hospitalisations  
6 might be due to increases in pre-admission mortality can be conclusively ruled out because mortality rates  
7 due to sudden death or poorly defined causes not only decreased across the study period but they actually  
8 decreased to a greater extent.[2] Errors of measurement that are inherent in the ecological design and limit  
9 causal inference are of little relevance in this study, in view of the fact that, in all the factors considered,  
10 causality was clearly shown. Identification of incident cases was based on an estimate but the method used  
11 was validated, with high sensitivity and specificity values being obtained. What is more, the proportion of  
12 cases of acute infarction with previous clinical history in our series (26.6%) agrees with the results of the  
13 PRIAMHO II Registry,[42] in which 24% of cases were shown to have a history of previous infarction or  
14 revascularisation.  
15  
16  
17  
18  
19  
20  
21

22 The remaining potential study limitations stem from the nature of the available data and, were they to have  
23 some impact, would in all cases bias the results towards the null hypothesis and so tend to underestimate  
24 the effect. With respect to the exposure data studied, these were drawn from a self-report questionnaire  
25 without any objective measures of smoking, weight and height; and, while self-reported smoking data are  
26 regarded as valid, those on obesity and overweight may be underestimated. The data relating to drug use  
27 refer to total use: these drugs are prescribed, not only for primary prevention, but also for secondary  
28 prevention and treatment of other conditions, such as arrhythmias and heart failure. Nevertheless the  
29 frequency of these diseases is infinitely lower than the prevalence of vascular risk in the general adult  
30 population, and is indeed almost negligible in comparison. At all events, the error would, yet again, tend  
31 more towards overestimating exposure and, by extension, underestimating the effect. Lastly, specific dietary  
32 factors (i.e., fish, vegetables or alcoholic beverages), nutritional factors (i.e. fats) and physical activity factors  
33 were not analysed for reasons of parsimony; instead, the frequency of obesity and overweight was used as  
34 an indicator of quality of diet and physical activity as a whole.  
35  
36  
37  
38  
39  
40  
41  
42

43 In conclusion, after decades of continuous rises, incidence of IHD hospitalisation fell from 1997 onwards, a  
44 decline that was associated with the decrease in smoking and, in equal measure, with the increase in  
45 vascular risk drug therapy. The cumulative decline of 52% over 13 years might have been even greater if  
46 there had not been a concomitant increase in the prevalence of excessive weight, also associated with  
47 incidence. These results indicate that current IHD primary prevention strategies have been effective at a  
48 population level, thanks to an appropriate balance between financial and health goals, something that should  
49 be left intact despite the current economic crisis. Future strategies should lay special stress on the  
50 prevention and treatment of excessive weight.  
51  
52  
53  
54  
55  
56  
57  
58  
59  
60

## Acknowledgement

The authors would like to thank Michael Benedict for his help with the English version of the manuscript.

## Competing Interests

The authors declare that they have no competing interests.

## Funding

This study was supported by Independent Clinical Research grant EC11-282 from the Ministry of Health, Social Services & Equality. The funders had no role in study design, data collection and analysis, decision to publish, or preparation of the manuscript. This research received no grants from any commercial sector.

## Figure legends

Figure 1. Annual trends in explanatory variables and incident ischaemic heart disease hospitalisation rates.

Figure 2. Time series of incidence analysed using non-parametric generalised additive models. Left plot: smoothed series adjusted for age and sex. Right plot: smoothed series adjusted for age, sex, prevalence of smoking, obesity and overweight, and use of cardiovascular disease prevention drug therapy.

## Author Contributions

MJM conceived of the study, its design and coordinated the research team. MJM, EA-C, CO, and IG performed the statistical analysis and interpretation of data and prepared the draft manuscript. All authors participated in the design of the study and in critical review of the manuscript. All authors read and approved the final manuscript.

## Data sharing

Technical appendix and supplementary material available on request from the corresponding author for scientific non-commercial use. Individual patient datasets are protected by Spanish regulations; these may be obtained from the Spanish Ministry of Health and the National Institute of Statistics under specific data loan agreements.

## REFERENCES

1. Marrugat J, Elosua R, Aldasoro E, et al. Regional variability in population acute myocardial infarction cumulative incidence and mortality rates in Spain 1997 and 1998. *Eur J Epidemiol* 2004;**19**(9):831-9.
2. Instituto Nacional de Estadística. Defunciones según la causa de muerte. Madrid: INE Available from: URL: <http://www.ine.es/jaxi/menu.do?type=pcaxis&path=/t15/p417&file=inebase&L=0> (accessed 23 May 2013).
3. Medrano-Albero MJ, Boix-Martinez R, Cerrato-Crespan E, et al. [Incidence and prevalence of ischaemic heart disease and cerebrovascular disease in Spain: a systematic review of the literature]. *Rev Esp Salud Publica* 2006;**80**(1):5-15.
4. Madrid: Ministerio de Sanidad y Consumo. Estrategia frente a la Cardiopatía Isquémica del Sistema Nacional de Salud. 2006.
5. Brotons C, Royo-Bordonada MA, Alvarez-Sala L, et al. [Spanish adaptation of the European Guidelines on Cardiovascular Disease Prevention]. *Rev Esp Salud Publica* 2004;**78**(4):435-8.
6. Graham I, Atar D, Borch-Johnsen K, et al. Guías de práctica clínica sobre prevención de la enfermedad cardiovascular: versión resumida. *Rev Esp Cardiol* 2008;**61**(1):e1-e49.
7. Pearson TA, Blair SN, Daniels SR, et al. AHA Guidelines for Primary Prevention of Cardiovascular Disease and Stroke: 2002 Update: Consensus Panel Guide to Comprehensive Risk Reduction for Adult Patients Without Coronary or Other Atherosclerotic Vascular Diseases. American Heart Association Science Advisory and Coordinating Committee. *Circulation* 2002;**106**(3):388-91.
8. Marrugat J, D'Agostino R, Sullivan L, et al. An adaptation of the Framingham coronary heart disease risk function to European Mediterranean areas. *J Epidemiol Community Health* 2003;**57**(8):634-8.
9. Conroy RM, Pyorala K, Fitzgerald AP, et al. Estimation of ten-year risk of fatal cardiovascular disease in Europe: the SCORE project. *Eur Heart J* 2003;**24**(11):987-1003.
10. Ballesteros Arribas JM, Dal-Re Saavedra M, Perez-Farinos N, et al. [The Spanish strategy for nutrition, physical activity and the prevention of obesity (NAOS Strategy)]. *Rev Esp Salud Publica* 2007;**81**(5):443-9.
11. World Health Organization. The challenge of obesity in the WHO European Region and the strategies for response. Copenhagen, Denmark Europe: 2007 Available from: URL: [http://www.euro.who.int/\\_data/assets/pdf\\_file/0010/74746/E90711.pdf](http://www.euro.who.int/_data/assets/pdf_file/0010/74746/E90711.pdf) (accessed 23 May 2013).
12. Tan CE, Glantz SA. Association between smoke-free legislation and hospitalizations for cardiac, cerebrovascular, and respiratory diseases: a meta-analysis. *Circulation* 2012;**126**(18):2177-83.
13. Dove MS, Dockery DW, Mittleman MA, et al. The impact of Massachusetts' smoke-free workplace laws on acute myocardial infarction deaths. *Am J Public Health* 2010;**100**(11):2206-12.
14. Rothwell PM. External validity of randomised controlled trials: "to whom do the results of this trial apply?". *Lancet* 2005;**365**(9453):82-93.
15. Ford ES, Ajani UA, Croft JB, et al. Explaining the decrease in U.S. deaths from coronary disease, 1980-2000. *N Engl J Med* 2007;**356**(23):2388-98.
16. Laatikainen T, Critchley J, Vartiainen E, et al. Explaining the decline in coronary heart disease mortality in Finland between 1982 and 1997. *Am J Epidemiol* 2005;**162**(8):764-73.



17. Capewell S, Beaglehole R, Seddon M, et al. Explanation for the decline in coronary heart disease mortality rates in Auckland, New Zealand, between 1982 and 1993. *Circulation* 2000;**102**(13):1511-6.
18. Unal B, Critchley JA, Capewell S. Explaining the decline in coronary heart disease mortality in England and Wales between 1981 and 2000. *Circulation* 2004;**109**(9):1101-7.
19. Bjorck L, Rosengren A, Bennett K, et al. Modelling the decreasing coronary heart disease mortality in Sweden between 1986 and 2002. *Eur Heart J* 2009;**30**(9):1046-56.
20. Palmieri L, Bennett K, Giampaoli S, et al. Explaining the decrease in coronary heart disease mortality in Italy between 1980 and 2000. *Am J Public Health* 2010;**100**(4):684-92.
21. Flores-Mateo G, Grau M, O'Flaherty M, et al. [Analyzing the coronary heart disease mortality decline in a Mediterranean population: Spain 1988-2005]. *Rev Esp Cardiol* 2011;**64**(11):988-96.
22. Yeh RW, Sidney S, Chandra M, et al. Population trends in the incidence and outcomes of acute myocardial infarction. *N Engl J Med* 2010;**362**(23):2155-65.
23. Chen J, Normand SL, Wang Y, et al. Recent declines in hospitalizations for acute myocardial infarction for Medicare fee-for-service beneficiaries: progress and continuing challenges. *Circulation* 2010;**121**(11):1322-8.
24. Barchielli A, Balzi D, Naldoni P, et al. Hospital discharge data for assessing myocardial infarction events and trends, and effects of diagnosis validation according to MONICA and AHA criteria. *J Epidemiol Community Health* 2012;**66**(5):462-7.
25. Briffa T, Nedkoff L, Peeters A, et al. Discordant age and sex-specific trends in the incidence of a first coronary heart disease event in Western Australia from 1996 to 2007. *Heart* 2011;**97**(5):400-4.
26. Shalev V, Goldshtein I, Porath A, et al. Continuation of statin therapy and primary prevention of nonfatal cardiovascular events. *Am J Cardiol* 2012;**110**(12):1779-86.
27. Agencia Española de Medicamentos y Productos Sanitarios. Informes del Observatorio de Uso de Medicamentos. Madrid: AEMPS Available from: URL: <http://www.aemps.gob.es/medicamentosUsoHumano/observatorio/informes.htm> (accessed 23 Aug. 2012).
28. Ministerio de Sanidad Política Social e Igualdad. Portal Estadístico del SNS. Madrid: MSSSI Available from: URL: <http://www.msssi.gob.es/estadEstudios/estadisticas/sisInfSanSNS/home.htm> (accessed 23 Aug. 2012).
29. R: A language and environment for statistical computing [computer program]. Version 2.15.0. Vienna, Austria: R Foundation for Statistical Computing; 2012.
30. Alpert JS, Thygesen K, Antman E, et al. Myocardial infarction redefined--a consensus document of The Joint European Society of Cardiology/American College of Cardiology Committee for the redefinition of myocardial infarction. *J Am Coll Cardiol* 2000;**36**(3):959-69.
31. Grau M, Elosua R, Cabrera de Leon A, et al. [Cardiovascular risk factors in Spain in the first decade of the 21st Century, a pooled analysis with individual data from 11 population-based studies: the DARIOS study]. *Rev Esp Cardiol* 2011;**64**(4):295-304.
32. Ministerio de Sanidad Política Social e Igualdad. Protección de la salud: tabaco. Legislación, índice cronológico. Madrid: MSSSI Available from: URL: <http://www.msssi.gob.es/ciudadanos/proteccionSalud/tabaco/legislacion.htm> (accessed 23 May 2013).
33. Villalbi JR, Sanchez E, Benet J, et al. The extension of smoke-free areas and acute myocardial infarction mortality: before and after study. *BMJ Open* 2011;**1**(1):e000067.

- 1  
2  
3 34. Agüero F, Degano IR, Subirana I, et al. Impact of a partial smoke-free legislation on myocardial  
4 infarction incidence, mortality and case-fatality in a population-based registry: the REGICOR Study.  
5 *PLoS One* 2013;**8**(1):e53722.  
6  
7 35. Redberg RF, Katz MH. Healthy men should not take statins. *JAMA* 2012;**307**(14):1491-2.  
8  
9 36. Brugts JJ, Yetgin T, Hoeks SE, et al. The benefits of statins in people without established  
10 cardiovascular disease but with cardiovascular risk factors: meta-analysis of randomised controlled  
11 trials. *BMJ* 2009;**338**:b2376.  
12  
13 37. Ray KK, Seshasai SR, Erqou S, et al. Statins and all-cause mortality in high-risk primary prevention: a  
14 meta-analysis of 11 randomized controlled trials involving 65,229 participants. *Arch Intern Med*  
15 2010;**170**(12):1024-31.  
16  
17 38. Taylor F, Ward K, Moore TH, et al. Statins for the primary prevention of cardiovascular disease.  
18 *Cochrane Database Syst Rev* 2011;(1):CD004816.  
19  
20 39. Thavendiranathan P, Bagai A, Brookhart MA, et al. Primary prevention of cardiovascular diseases with  
21 statin therapy: a meta-analysis of randomized controlled trials. *Arch Intern Med* 2006;**166**(21):2307-13.  
22  
23 40. Vrečer M, Turk S, Drinovec J, et al. Use of statins in primary and secondary prevention of coronary  
24 heart disease and ischemic stroke. Meta-analysis of randomized trials. *Int J Clin Pharmacol Ther*  
25 2003;**41**(12):567-77.  
26  
27 41. Ministerio de Sanidad Política Social e Igualdad. Economía del Medicamento y Productos Sanitarios.  
28 Madrid: MSSSI Available from: URL:  
29 <http://www.msssi.gob.es/profesionales/farmacia/legislacion/economia/home.htm> (accessed 26 May  
30 2013).  
31  
32 42. Aros F, Cunat J, Loma-Osorio A, et al. [Management of myocardial infarction in Spain in the year  
33 2000. The PRIAMHO II study]. *Rev Esp Cardiol* 2003;**56**(12):1165-73.  
34  
35  
36  
37  
38  
39  
40  
41  
42  
43  
44  
45  
46  
47  
48  
49  
50  
51  
52  
53  
54  
55  
56  
57  
58  
59  
60

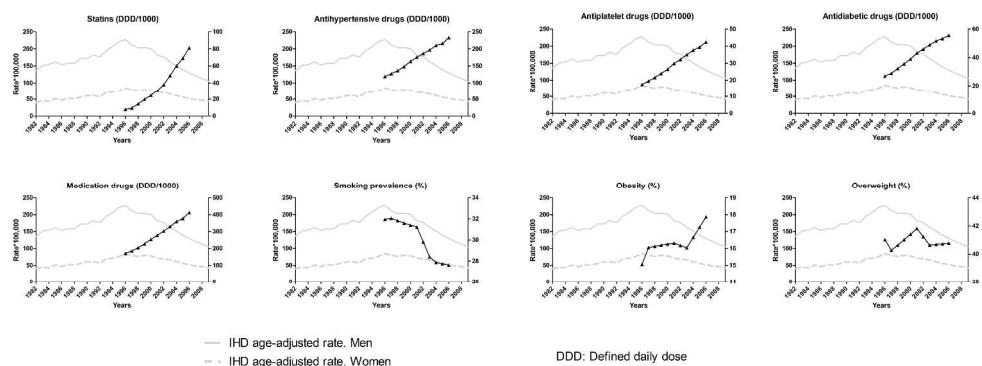

Figure 1. Annual trends in explanatory variables and incident ischaemic heart disease hospitalisation rates. 2209x847mm (96 x 96 DPI)

Peer review only

1  
2  
3  
4  
5  
6  
7  
8  
9  
10  
11  
12  
13  
14  
15  
16  
17  
18  
19  
20  
21  
22  
23  
24  
25  
26  
27  
28  
29  
30  
31  
32  
33  
34  
35  
36  
37  
38  
39  
40  
41  
42  
43  
44  
45  
46  
47  
48  
49  
50  
51  
52  
53  
54  
55  
56  
57  
58  
59  
60

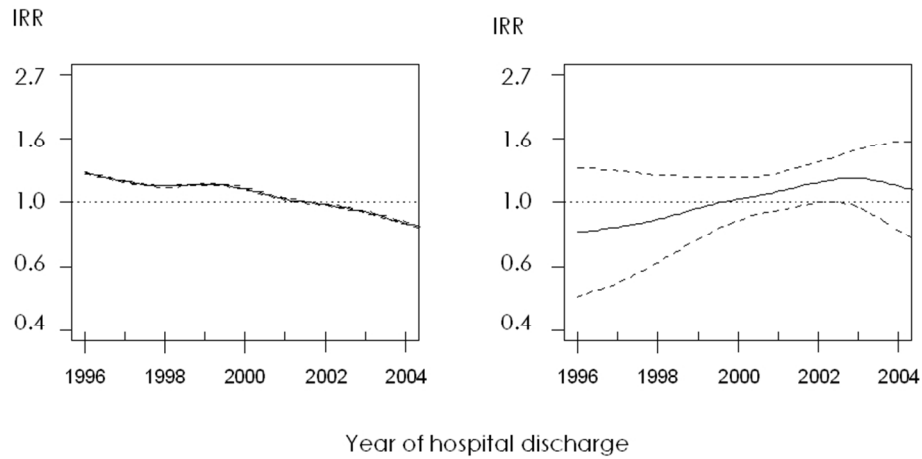

Figure 2. Time series of incidence analysed using non-parametric generalised additive models. Left plot: smoothed series adjusted for age and sex. Right plot: smoothed series adjusted for age, sex, prevalence of smoking, obesity and overweight, and use of cardiovascular disease prevention drug therapy.  
82x44mm (300 x 300 DPI)

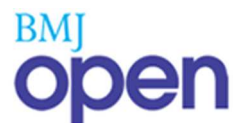

**EFFECT OF CARDIOVASCULAR PREVENTION STRATEGIES ON  
INCIDENT CORONARY DISEASE HOSPITALISATION RATES  
IN SPAIN. AN ECOLOGICAL TIME SERIES ANALYSIS**

|                                 |                                                                                                                                                                                                                                                                                                                        |
|---------------------------------|------------------------------------------------------------------------------------------------------------------------------------------------------------------------------------------------------------------------------------------------------------------------------------------------------------------------|
| Journal:                        | <i>BMJ Open</i>                                                                                                                                                                                                                                                                                                        |
| Manuscript ID:                  | bmjopen-2013-004257.R1                                                                                                                                                                                                                                                                                                 |
| Article Type:                   | Research                                                                                                                                                                                                                                                                                                               |
| Date Submitted by the Author:   | 13-Dec-2013                                                                                                                                                                                                                                                                                                            |
| Complete List of Authors:       | Medrano, María José; Carlos III Institute of Health, National Centre of Epidemiology<br>Alcalde-Cabero, Enrique; Carlos III Institute of Health, National Centre of Epidemiology<br>Ortiz, Cristina; Carlos III Institute of Health, National Centre of Epidemiology<br>Galán, Iñaki; National Centre of Epidemiology, |
| <b>Primary Subject Heading</b>: | Public health                                                                                                                                                                                                                                                                                                          |
| Secondary Subject Heading:      | Cardiovascular medicine, Epidemiology, Health policy                                                                                                                                                                                                                                                                   |
| Keywords:                       | Coronary heart disease < CARDIOLOGY, PUBLIC HEALTH, EPIDEMIOLOGY, PREVENTIVE MEDICINE                                                                                                                                                                                                                                  |
|                                 |                                                                                                                                                                                                                                                                                                                        |

SCHOLARONE™  
Manuscripts

1  
2  
3  
4  
5  
6  
7 **EFFECT OF CARDIOVASCULAR PREVENTION STRATEGIES ON INCIDENT CORONARY DISEASE**  
8 **HOSPITALISATION RATES IN SPAIN. AN ECOLOGICAL TIME SERIES ANALYSIS**  
9

10  
11  
12  
13  
14 **Authors**

15 *María José Medrano, Enrique Alcalde-Cabero, Cristina Ortiz, Iñaki Galán.*  
16  
17  
18  
19

20 **Author affiliations**

21 National Centre for Epidemiology, Carlos III Institute of Health, Madrid, Spain.  
22  
23  
24

25 **Corresponding author**

26 MJ Medrano  
27

28 Centro Nacional de Epidemiología  
29

30 Instituto de Salud Carlos III  
31

32 C/ Sinesio Delgado, 6  
33

34 28029 Madrid, Spain  
35

36 [pmedrano@isciii.es](mailto:pmedrano@isciii.es)  
37

38 Phone: 34918222639  
39

40 Fax: 34913877816  
41  
42  
43

44 **Key words**

45  
46 Coronary heart disease. Prevention. Public Health  
47

48 **Word count:** 3975  
49  
50  
51  
52  
53  
54  
55  
56  
57  
58  
59  
60

**ABSTRACT**

**Objective:** To assess the overall population impact of primary prevention strategies (promotion of healthy lifestyles, prevention of smoking and use of vascular risk drug therapy) of coronary disease in Spain.

**Design:** Ecological time series analysis, 1982 to 2009.

**Setting:** All public and private hospitals in Spain.

**Participants:** General population.

**Outcome:** Incident coronary disease hospitalization as derived from official hospital discharge data.

**Methods:** Annual hospitalisation rates were modelled according to nationwide use of statins, antihypertensive, antidiabetic and antiplatelet drugs, and prevalences of smoking, obesity and overweight. Additive generalised models and mixed Poisson regression models were used for the purpose, taking year as the random-effect variable and adjusting for age, sex, prevalence of vascular risk factors, and hospital beds in intensive and coronary care units.

**Results:** Across 28 years and 671.5 million persons-year of observation, there were 2,986,834 hospitalisations due to coronary disease; of these, 1,441,980 (48.28%) were classified as incident. Hospitalisation rates increased from 1982 to 1996, with an inflection point in 1997 and a subsequent 52% decrease until 2009. Prevalences of smoking, obesity, overweight and use of vascular risk drug therapy were significantly associated with hospitalisation rates ( $p < 0.001$ ): incidence rates ratios (95% CI) for the fourth versus the first quartile were 1.46 (1.42-1.50), 1.80 (1.78-1.83), 1.58 (1.55-1.60) and 0.57 (0.51-0.63) respectively. These variables accounted for 92% of interannual variability.

**Conclusion:** After decades of continuous rises, hospitalisation due to incident IHD has been cut by half, an achievement associated with the decline in smoking and the increase in vascular risk drug therapy. These results indicate that these two primary prevention strategies have been effective at a population level, thanks to an appropriate balance between financial and health goals, something that should be left intact despite the current economic crisis. Future strategies ought to lay special stress on excessive body weight prevention.

## STRENGTHS AND LIMITATIONS OF THIS STUDY

1  
2  
3  
4  
5  
6  
7 • The study shows that the decline in coronary disease in Spain was associated with the exponential  
8 increase in pharmacological treatment of vascular risk, together with the decline in active smoking that  
9 followed the strong interventions against tobacco use implemented in mid and late '90s. This decrease in  
10 IHD hospitalisation rates could have been even greater, had it not been for the frequency of excessive  
11 weight, which not only failed to decline but actually rose.  
12  
13

14  
15  
16  
17 • The exposure-effect associations found: 1- are of great magnitude; 2- show a strong dose-response  
18 relationship; 3-show a correct temporality; 4- are biologically plausible; and 5- are consistent with similar  
19 studies in other countries, with trends in other tobacco-related diseases and with the increase in the rates of  
20 detection, treatment and control of vascular risk factors in Spain.  
21  
22  
23

24  
25  
26 • The results are relevant as some of these measures (i.e. broad use of statins in general population)  
27 are still controversial. Moreover, the results may substantially affect public health policy, especially in a  
28 context of financial crisis.  
29  
30  
31

32  
33 • This is an ecological study based on health indicators and targeted at the assessment of public  
34 health; its results should not be interpreted as outcomes of intervention trials, even though they may nuance  
35 the latter insofar as they provide an illustration of their external validity.  
36  
37  
38  
39  
40  
41  
42  
43  
44  
45  
46  
47  
48  
49  
50  
51  
52  
53  
54  
55  
56  
57  
58  
59  
60



## INTRODUCTION

Ischaemic heart disease (IHD) is a severe disease, is lethal in its acute form in 20%-30% of cases [1] – indeed, it is the leading cause of death in men and the second leading cause of death in women in Spain [2]– and is chronically incapacitating in a great proportion of survivors. Its frequency in the Spanish population is high, with population incidence being estimated at 207 and 45/100,000 in men and women respectively, and hospitalisations at 140,000 cases annually.[3] Consequently, this situation became a public health priority and the target of specific health-planning strategies at a national level.[4]

The main vascular risk factors (excessive body weight, smoking habit, hypercholesterolaemia, arterial hypertension and diabetes mellitus) can be modified by changes in lifestyle or therapeutic interventions. In recent years, cardiovascular disease prevention has therefore been the focus of a major collective effort, in which health professionals as well as scientific societies, the pharmaceutical industry and health administrations have all taken part. The pillars of IHD prevention have been prevention of smoking, promotion of healthy lifestyles, and detection, treatment and medical control of arterial hypertension, hypercholesterolaemia, diabetes mellitus and platelet aggregation in high risk patients.[4,5] These strategies have been generally implemented throughout the Spanish National Health System, as a result of recommendations made by the respective health authorities,[4] prevention guidelines drawn up by experts and scientific societies both domestic and international,[5-7] and the development of risk functions which not only enable patients to be stratified according to their individual coronary risk, estimated on the basis of vascular risk factors taken jointly,[8,9] but also serve as a guide when it comes to making therapeutic decisions about controlling vascular risk.

The promotion of healthy habits has specifically centred on diet and physical exercise.[10] Prevalence of obesity and overweight is regarded as an indicator of inadequate diet and physical activity.[4,11] With respect to smoking, the impact of anti-smoking interventions on coronary risk has been comprehensively described at both an individual and a population level. Hence, assessment of epidemiological anti-smoking legislation in a number of countries has shown its effectiveness in terms of IHD mortality and morbidity.[12,13] Lastly, the use of cardiovascular disease prevention drug therapy in healthy persons has demonstrated its effectiveness at an individual level in many clinical trials, though it is not known whether this effectiveness has been reflected at a population level, i.e., its epidemiological impact. Clinical trials are conducted under controlled experimental conditions and the patients included are selected on the basis of strict inclusion and exclusion criteria. Consequently, such studies do not represent the general population and their results may possibly not be seen at a population level (external validity).[14]

To our knowledge, there is no study that has assessed the joint impact of these cardiovascular disease prevention measures on IHD incidence. Epidemiological studies undertaken in different countries,[15-20] including Spain,[21] have linked the decrease in cardiovascular and ischaemic heart disease mortality to the decline in population levels of vascular risk factors. In Spain, 50% of the reduction in coronary mortality is estimated to be due to changes in risk factors, essentially total cholesterol (close on 31% of the fall in

1  
2  
3 mortality) and systolic blood pressure (15%).[21] Most of these studies have, however, been based on  
4 IMPACT methodology,[17,18] which was designed to assess changes in mortality but has not been adapted  
5 to the task of assessing morbidity. Recent studies in the USA,[22,23] Italy [24] and Australia [25] have  
6 reported a decrease in IHD-related hospital morbidity, which was linked to anti-smoking legislation and the  
7 use of cardioprotective medication, though these associations were not statistically proved. Lastly, a recent  
8 population-based observational study in Israel [26] assessed the effect of continued use of statins on the  
9 incidence of acute infarction and coronary revascularisation but did not consider the effect of use of  
10 antihypertensive, antiplatelet or antidiabetic drugs.

11  
12  
13  
14  
15 Accordingly, the aim of this study was to describe the time trend in hospital incident-IHD-related morbidity  
16 rates and assess the impact of smoking prevention, promotion of healthy lifestyles and the use of  
17 cardiovascular disease prevention drug therapy, using the following as indicators: population prevalence of  
18 smoking; prevalence of obesity and overweight; and use of statins and antihypertensive, antiplatelet and  
19 antidiabetic drugs.  
20  
21

## 22 23 24 25 **METHODS**

26  
27  
28 We conducted an epidemiological assessment study into the impact of preventive measures using  
29 regression analysis and time-series modelling and, for study purposes, including the total Spanish population  
30 over 29 years of age. The period considered in the description of the time series was 1982 to 2009, avoiding  
31 the years preceding the entry into force of the International Classification of Diseases, 9<sup>th</sup> Revision, Clinical  
32 Modification (ICD-9-CM). In the analysis of related factors, the series was restricted to the period 1996–2006,  
33 since this was the period for which data on all the explanatory variables were available.  
34  
35

### 36 37 38 **1- Principal and secondary variables. Data-sources.**

39 The outcome variable was frequency of hospitalisation due to incident IHD (ICD-9-CM codes 410-414, with  
40 four digits), expressed in descriptive analyses in the form of annual age-adjusted rates according to the  
41 Standard European Population. Data on hospital discharges due to this cause were drawn from anonymised  
42 MBDS microfiches (Minimum Basic Data Set/*Conjunto Mínimo Básico de Datos*, the official nation-wide  
43 administrative and statistical database which includes clinical and demographic data on every hospital  
44 discharge, obtained from the pertinent medical records), and were completed with a patient discharge  
45 sample from some private hospitals that were not included in the MBDS. The fiches were supplied by the  
46 National Statistics Institute (NSI) (*Instituto Nacional de Estadística*) under a data loan agreement containing  
47 an undertaking of confidentiality and respect for statistical secrecy. Population data for calculating the rates  
48 for each year, sex and age group were obtained from NSI intercensal estimates. The age strata were 5-year  
49 age groups starting from 30 to 85 and older.  
50  
51  
52  
53

54  
55 An incident event was defined as that in which the following two conditions were fulfilled: a) diagnosis at  
56 discharge of acute IHD, acute myocardial infarction, intermediate coronary syndrome (unstable angina) or  
57  
58

1  
2  
3 angina pectoris (ICD 410, 411 or 413); and, b) first admission due to IHD, as shown by a check for duplicate  
4 entries based on the fields, "sex", "date of birth" and "province of residence". Events for which control for  
5 duplicates could not be performed for lack of any record of the patient's complete date of birth (n= 91,176,  
6 3.1%), were excluded.  
7  
8

9  
10 The method used to control for duplicates was validated by comparing the results against data on 30,205  
11 hospitalisations in eight cities for which patient identification codes were available, yielding a sensitivity of  
12 97.88% and specificity of 88.73. The distribution by age, sex and diagnostic category of this validation  
13 sample did not differ from that of the study population.  
14

15  
16 The variables considered as potentially explanatory of the trend in IHD hospitalisation rates in the population  
17 were:  
18

- 19  
20  
21 - use of statins (atorvastatin, cerivastatin, fluvastatin, lovastatin, pravastatin and simvastatin);  
22 - use of antihypertensive drugs (angiotensin II receptor antagonists, angiotensin-converting enzyme  
23 inhibitors, betablockers, diuretics, calcium channel blockers and others);  
24 - use of platelet aggregation inhibitors (aspirin, carbasalate, clopidogrel, dipyridamol, citazol,  
25 ticlopidine and triflusal);  
26 - use of antidiabetic drugs (insulins, biguanides, sulphonylureas, alpha-glucosidase inhibitors,  
27 thiazolidinediones and combinations of these).  
28  
29

30 The use of these drugs was expressed in Defined Daily Doses (DDD) per 1,000 inhabitants per day  
31 (DHDs), for the period 1996-2006. These data were drawn from reports issued by the Spanish  
32 Medications & Health Products Agency on the basis of data on packages dispensed under and  
33 charged to the National Health System.[27] The methodology used is described in detail in these  
34 publications. DHDs divided by 10 were introduced into the models, with the estimators having to be  
35 interpreted as the effect for every increase of 10 units in the DHD.  
36  
37

- 38 - prevalence, with a breakdown by year, sex and age, of smoking, overweight, obesity, arterial  
39 hypertension, hypercholesterolaemia and diabetes mellitus obtained from self-report data in the  
40 1987,1993, 1995, 1997, 2001, 2003 and 2006 National Health Surveys,[28] with data for the  
41 intermediate years being estimated by means of linear interpolation of data for the pivotal years.  
42  
43 - Number of physically available hospital beds in intensive care and coronary care units per 1,000  
44 inhabitants.[28]  
45  
46  
47

## 48 **2- Data-analysis**

49 Weightings specified by the NSI were used for the calculation of the number of cases. In descriptive  
50 analyses, age-adjusted incident IHD hospitalisation rates (Standard European Population) were calculated  
51 for each year and sex. These rates were depicted graphically, as were the frequency measures of the  
52 remaining explanatory variables for each year.  
53  
54

55  
56 The effect of the explanatory variables on incident IHD morbidity was estimated on the basis of incidence  
57  
58

1  
2  
3 rates ratios (IRRs) derived from mixed Poisson regression models of fixed and random effects, with year  
4 being introduced as the random-effect variable, using the command 'xtmepoisson' implemented in Stata,  
5 that fits mixed-effects models for count responses assuming a Poisson distribution of the data. This approach  
6 enables one to control for both temporal autocorrelation and overdispersion, measure interannual variability  
7 explained by the preventive measures, and minimise the risk of residual confounding. The dependent  
8 variable was the number of incident hospitalisations in each sex and age stratum, and the national  
9 population figure of each stratum was introduced as the exposed population. This is equivalent to modelling  
10 of rates. The explanatory variables were sequentially introduced, successively obtaining age- and sex-  
11 adjusted estimators and multivariate estimators. We considered the concurrent effect across time of the  
12 explanatory variables and hospitalisation, plus the effect with lags of one, two and three years, so as to take  
13 into account the possible latency between exposure and its effect, and assess the temporality of the  
14 associations.  
15  
16  
17  
18  
19

20  
21 The effect of drug therapy for control of vascular risk was analysed for each type of drug (statins, and  
22 antihypertensive, antiplatelet and antidiabetic drugs), both individually and jointly, using the variable "drug  
23 use for control of vascular risk" obtained by adding together the respective usages of each type to avoid the  
24 strong collinearity that characterises the consumption of such drugs (correlation coefficients of 0.97 to 0.99).  
25 The explanatory variables categorised in quartiles were included in the models for dose-response analysis.  
26 These models were used to measure the interannual variability explained by the variables, calculated as 1  
27 minus the ratio between the variance of the random term in the complete model, and the variance of the  
28 random term in the model without prevention explanatory variables and in the model adjusted for age and  
29 sex.  
30  
31  
32  
33

34  
35 Lastly, the incidence time series was analysed and plotted graphically with the aid of Poisson non-parametric  
36 generalised additive models (GAMs) implemented in the mgcv library of the R statistical package version  
37 2.15.0 (2012-03-30).[29] GAM models allow to graphically depict the relationship including both smoothing  
38 and also a non-parametric fit, with no a priori assumptions on the actual relationship between response and  
39 predictor. As time is used as the predictor, the result is a smoothed time series of the response. The rates  
40 were modelled and smoothed by reference to time, and the smoothed age- and sex-adjusted series were  
41 depicted graphically. The explanatory variables were subsequently included in these models to depict the  
42 trends not due to these variables.  
43  
44  
45  
46

47 (See technical appendix in supplementary material for theoretical basis of models and technical details)  
48  
49

## 50 RESULTS

51  
52 Across the 28 years and 671.5 million persons-year of observation, there were 2,986,834 hospitalisations in  
53 Spain due to IHD; and of these, 1,441,980 (66.7% men and 33.3% women), accounting for 48.28% of the  
54 total, were classified as incident. Mean age at admission was  $65.9 \pm 12.8$  years, with a higher frequency in  
55 the 60- to 74-year age group (41.9%). Diagnosis at discharge was acute infarction in 55%, unstable angina  
56  
57  
58  
59  
60

in 14.7%, and stable angina in 30.3% of cases. Women's mean age was 5 years older ( $p < 0.001$ ), and the over-74-year age group was far more frequent among women than among men (data not shown in tables).

The annual age-adjusted incident IHD hospitalisation rates per 100,000, which are depicted graphically in Figure 1, show a rise from 1982 to 1996, a sharp inflection in 1997 and a subsequent cumulative decrease of 52.0% until 2009 (53.5% and 49.6% in men and women respectively). The decline was constant throughout the period, save for a slight increase in 2000, coinciding with the change in the definition of ischaemic heart disease. The distribution by sex of the incidence rates changed across the study period, with a decrease in the male/female ratio from 3.3 to 2.4.

Of the total study period (1982-2009), data on indicators of cardiovascular disease prevention (prevalence of smoking, prevalence of obesity and overweight, and use of drug therapy for control of vascular risk) were available for the period 1996-2006. These years witnessed a rise in the use of statins (948.9%) and antihypertensive (95.4%), antiplatelet (105%) and antidiabetic drugs (142%), and a decline in smoking prevalence (6.8% in women and 23.8% in men). Prevalence of obesity increased by 40% (Table 1, Figure 1).

Table 1. Annual trends in explanatory variables in Spanish general population.

|                                                                                                           | 1996  | 1997  | 1998  | 1999  | 2000  | 2001  | 2002  | 2003  | 2004  | 2005  | 2006  |
|-----------------------------------------------------------------------------------------------------------|-------|-------|-------|-------|-------|-------|-------|-------|-------|-------|-------|
| Proportion (%) Smokers                                                                                    | 31,9  | 32,0  | 31,8  | 31,6  | 31,4  | 31,2  | 29,8  | 28,4  | 27,9  | 27,8  | 27,6  |
| Proportion (%) Obesity                                                                                    | 15,1  | 16,1  | 16,1  | 16,2  | 16,3  | 16,3  | 16,2  | 16,0  | 16,7  | 17,3  | 17,9  |
| Proportion (%) Overweight                                                                                 | 41,0  | 40,3  | 40,6  | 41,0  | 41,4  | 41,8  | 41,2  | 40,6  | 40,7  | 40,7  | 40,8  |
| Drugs for control of vascular risk.<br>No. of Defined Daily Doses* per<br>1000 inhabitants per day (x10). |       |       |       |       |       |       |       |       |       |       |       |
| Total                                                                                                     | 171,5 | 185,6 | 204,9 | 227,7 | 253,8 | 279,2 | 303,0 | 329,7 | 359,6 | 377,7 | 412,3 |
| Statins                                                                                                   | 7,8   | 9,4   | 14,3  | 19,7  | 24,4  | 30,4  | 38,0  | 48,7  | 60,1  | 69,2  | 81,3  |
| Antihypertensive drugs                                                                                    | 119,2 | 127,6 | 136,6 | 148,4 | 163,8 | 175,7 | 186,9 | 197,1 | 210,2 | 215,7 | 232,9 |
| Antidiabetic drugs                                                                                        | 27,0  | 28,9  | 32,3  | 35,6  | 39,1  | 43,2  | 46,0  | 48,9  | 51,7  | 53,3  | 55,7  |
| Antiplatelet drugs                                                                                        | 17,5  | 19,6  | 21,7  | 24,0  | 26,6  | 29,9  | 32,2  | 35,0  | 37,6  | 39,5  | 42,4  |

DDD: number of doses (adult average maintenance dose per day) prescribed and sold in the National Health System

Consumption of statins and antihypertensive, antiplatelet and antidiabetic drugs, individually considered, displayed an inverse and statistically significant relationship with incident IHD hospitalisation rates in models adjusted for age, sex and prevalences of smoking, obesity and overweight (Table 2), and this association became progressively greater when growing lags were taken into account. Similarly, the use of drugs

1  
2  
3 considered jointly was inversely associated (IRR 0.97, 95% CI 0.97-0.98) with IHD incidence. The greater  
4 magnitude of the effect of drug use when considered individually rather than jointly should not be construed  
5 as a discrepancy: instead, this is attributable both to the difference in scale, and to drug associations and the  
6 lack of adjustment among the individual drug usages due to collinearity. In contrast, prevalence of smoking  
7 and that of obesity and overweight were both positively associated with incidence of hospitalisation due to  
8 IHD. In the models in which adjustment was additionally made for prevalences of arterial hypertension,  
9 hypercholesterolaemia and diabetes mellitus, and for the number of physically available beds in intensive  
10 and coronary care units, the above associations were not substantially modified, i.e., the effect of frequency  
11 of smoking was not modified, the effect of frequency of obesity and overweight was slightly attenuated, and  
12 the inverse association with drug use was slightly accentuated, both when the respective types of drugs were  
13 considered individually and when they were considered jointly.  
14  
15  
16  
17  
18

19 Furthermore, these associations displayed a statistically significant dose-response relationship in the models  
20 adjusted for sex, age, the variables in the table, and year as a random-effect variable (Table 3): whereas the  
21 IRR of smoking prevalence in the fourth versus the first quartile was 1.46 (95%CI 1.42-1.50) and the IRRs for  
22 prevalence of obesity and overweight were 1.80 (1.78-1.83) and 1.58 (1.55-1.60) respectively, the IRR for  
23 cardiovascular disease prevention drug therapy was 0.57 (0.51-0.63). The linear trend was statistically  
24 significant for all four variables. The protective effect of cardiovascular disease prevention drug therapy was  
25 slightly attenuated when the growing lags between exposure and effect were taken into account (IRR lag 0=  
26 0.57 (0.51-0.63) / IRR lag 3=0.61 (0.57-0.66)). Similarly, while the association with prevalence of overweight  
27 was attenuated over time, the association was not modified when the growing lags between exposure and  
28 effect for prevalences of obesity and smoking habit were taken into account.  
29  
30  
31  
32

33 The interannual variability in hospitalisation rates explained by the models considering the four variables  
34 simultaneously (continuous scale) was: 92% for no lag between exposure and effect; 95% for a lag of one  
35 year; 97% for a lag of two years; and 94% for a lag of three years (data not shown in tables). The proportion  
36 of variability in annual rates explained by prevention variables raised from 92% with respect to the empty  
37 model, to 97% when calculated with respect to the model adjusted by age and sex, thus meaning a 5%  
38 variability in hospitalisation rates due to changes in age-sex population structure from 1996 to 2006.  
39  
40  
41  
42  
43  
44  
45  
46  
47  
48  
49  
50  
51  
52  
53  
54  
55  
56  
57  
58  
59  
60

Table 2. Effect of prevalence of smoking habit, obesity, overweight and use of cardiovascular disease prevention drug therapy on incident ischaemic heart disease hospitalisation rates on annual incident ischaemic heart disease hospitalisation rates 1996-2006. Models for exposure-effect lags of 0, 1, 2 and 3 years.

|                                                                                   | Lag0 |             | Lag1 |             | Lag2 |             | Lag3 |             |
|-----------------------------------------------------------------------------------|------|-------------|------|-------------|------|-------------|------|-------------|
|                                                                                   | IRR  | 95%CI       | IRR  | 95%CI       | IRR  | 95%CI       | IRR  | 95%CI       |
| <i>1. Adjustment for age, sex, year (random variable) and specified variables</i> |      |             |      |             |      |             |      |             |
| % Smokers                                                                         | 1.02 | (1.01-1.02) | 1.02 | (1.02-1.02) | 1.02 | (1.02-1.02) | 1.02 | (1.02-1.02) |
| % Obesity                                                                         | 1.05 | (1.04-1.05) | 1.05 | (1.05-1.05) | 1.05 | (1.05-1.05) | 1.06 | (1.05-1.06) |
| % Overweight                                                                      | 1.04 | (1.04-1.04) | 1.04 | (1.04-1.04) | 1.03 | (1.03-1.04) | 1.03 | (1.03-1.03) |
| Drug use (x10 DHDs*)¶                                                             | 0.97 | (0.97-0.98) | 0.97 | (0.97-0.97) | 0.97 | (0.97-0.97) | 0.97 | (0.96-0.97) |
| Statins¶                                                                          | 0.92 | (0.91-0.93) | 0.91 | (0.90-0.92) | 0.90 | (0.88-0.91) | 0.87 | (0.85-0.90) |
| Antihypertensive drugs¶                                                           | 0.95 | (0.94-0.95) | 0.94 | (0.94-0.95) | 0.94 | (0.94-0.94) | 0.93 | (0.93-0.94) |
| Antidiabetic drugs¶                                                               | 0.81 | (0.79-0.83) | 0.81 | (0.79-0.83) | 0.80 | (0.79-0.81) | 0.78 | (0.77-0.79) |
| Antiplatelet drugs¶                                                               | 0.77 | (0.76-0.79) | 0.77 | (0.75-0.79) | 0.75 | (0.74-0.77) | 0.72 | (0.70-0.74) |
| <i>2. Multivariate adjustment:**</i>                                              |      |             |      |             |      |             |      |             |
| % Smokers                                                                         | 1.01 | (1.01-1.01) | 1.02 | (1.01-1.02) | 1.02 | (1.02-1.02) | 1.02 | (1.02-1.02) |
| % Obesity                                                                         | 1.03 | (1.03-1.03) | 1.03 | (1.03-1.04) | 1.03 | (1.03-1.04) | 1.03 | (1.03-1.04) |
| % Overweight                                                                      | 1.03 | (1.03-1.03) | 1.03 | (1.03-1.03) | 1.03 | (1.02-1.03) | 1.03 | (1.03-1.03) |
| Drug use (10 DHDs*)¶                                                              | 0.96 | (0.96-0.97) | 0.96 | (0.96-0.97) | 0.96 | (0.96-0.96) | 0.96 | (0.96-0.96) |
| Statins¶                                                                          | 0.90 | (0.89-0.91) | 0.89 | (0.88-0.90) | 0.87 | (0.86-0.89) | 0.85 | (0.83-0.87) |
| Antihypertensive drugs¶                                                           | 0.92 | (0.91-0.93) | 0.92 | (0.91-0.93) | 0.92 | (0.92-0.93) | 0.92 | (0.92-0.93) |
| Antidiabetic drugs¶                                                               | 0.73 | (0.68-0.77) | 0.74 | (0.71-0.77) | 0.75 | (0.73-0.77) | 0.75 | (0.74-0.75) |
| Antiplatelet drugs¶                                                               | 0.70 | (0.66-0.73) | 0.70 | (0.67-0.73) | 0.70 | (0.68-0.71) | 0.68 | (0.67-0.70) |

\* DHDs: No. of Defined Daily Doses per 1000 inhabitants per day.\*\* Adjusted for variables specified in the table plus age, sex, year of discharge as a random-effect variable, prevalence (%) of arterial hypertension, prevalence (%) of hypercholesterolaemia, prevalence (%) of mellitus diabetes, and number of hospital beds in intensive care and coronary care units.¶ Not adjusted among themselves because collinearity.

Table 3. Dose-response analysis of the effect of prevalence of smoking habit, obesity, overweight and use of cardiovascular disease prevention drug therapy on incident ischaemic heart disease hospitalisation rates. Models for exposure-effect lags of 0, 1, 2 and 3 years.

|                          | Lag0  |             | Lag1  |             | Lag2  |             | Lag3  |             |
|--------------------------|-------|-------------|-------|-------------|-------|-------------|-------|-------------|
|                          | IRR** | 95%CI       | IRR** | 95%CI       | IRR** | 95%CI       | IRR** | 95%CI       |
| % Smokers                |       |             |       |             |       |             |       |             |
| 1 <sup>st</sup> quartile |       | 1.00        |       | 1.00        |       | 1.00        |       | 1.00        |
| 2 <sup>nd</sup> quartile | 0.92  | (0.91-0.93) | 0.91  | (0.90-0.93) | 0.92  | (0.91-0.94) | 0.93  | (0.91-0.94) |
| 3 <sup>rd</sup> quartile | 1.23  | (1.21-1.25) | 1.21  | (1.19-1.23) | 1.20  | (1.18-1.22) | 1.18  | (1.15-1.20) |
| 4 <sup>th</sup> quartile | 1.46  | (1.42-1.50) | 1.48  | (1.44-1.52) | 1.50  | (1.46-1.55) | 1.49  | (1.45-1.54) |
| <i>P trend</i>           |       | <0.001      |       | <.0001      |       | < 0.001     |       | < 0.001     |
| % Obesity                |       |             |       |             |       |             |       |             |
| 1 <sup>st</sup> quartile |       | 1.00        |       | 1.00        |       | 1.00        |       | 1.00        |
| 2 <sup>nd</sup> quartile | 1.46  | (1.44-1.47) | 1.45  | (1.43-1.46) | 1.34  | (1.33-1.36) | 1.32  | (1.30-1.33) |
| 3 <sup>rd</sup> quartile | 1.71  | (1.69-1.73) | 1.65  | (1.63-1.67) | 1.53  | (1.51-1.55) | 1.48  | (1.46-1.50) |
| 4 <sup>th</sup> quartile | 1.80  | (1.78-1.83) | 1.82  | (1.79-1.85) | 1.75  | (1.73-1.79) | 1.86  | (1.78-1.90) |
| <i>P trend</i>           |       | <0.001      |       | <0.001      |       | <0.001      |       | <0.001      |
| % Overweight             |       |             |       |             |       |             |       |             |
| 1 <sup>st</sup> quartile |       | 1.00        |       | 1.00        |       | 1.00        |       | 1.00        |
| 2 <sup>nd</sup> quartile | 1.23  | (1.22-1.24) | 1.21  | (1.19-1.22) | 1.14  | (1.13-1.16) | 1.06  | (1.05-1.08) |
| 3 <sup>rd</sup> quartile | 1.41  | (1.39-1.43) | 1.35  | (1.33-1.37) | 1.30  | (1.28-1.31) | 1.22  | (1.20-1.24) |
| 4 <sup>th</sup> quartile | 1.58  | (1.55-1.60) | 1.50  | (1.47-1.52) | 1.43  | (1.41-1.45) | 1.33  | (1.31-1.36) |
| <i>P trend</i>           |       | <0.001      |       | <0.001      |       | <0.001      |       | <0.001      |
| Use of drugs (x10 DHDs*) |       |             |       |             |       |             |       |             |
| 1 <sup>st</sup> quartile |       | 1.00        |       | 1.00        |       | 1.00        |       | 1.00        |
| 2 <sup>nd</sup> quartile | 0.85  | (0.76-0.93) | 0.87  | (0.80-0.94) | 0.83  | (0.78-0.88) | 0.84  | (0.78-0.90) |
| 3 <sup>rd</sup> quartile | 0.71  | (0.65-0.79) | 0.73  | (0.68-0.79) | 0.71  | (0.67-0.75) | 0.70  | (0.65-0.75) |
| 4 <sup>th</sup> quartile | 0.57  | (0.51-0.63) | 0.59  | (0.55-0.64) | 0.62  | (0.58-0.66) | 0.61  | (0.57-0.66) |
| <i>P trend</i>           |       | < 0.001     |       | < 0.001     |       | < 0.001     |       | < 0.001     |

\* DHDs: No. of Defined Daily Doses per 1000 inhabitants per day. \*\* IRR adjusted for variables specified in the table plus age, sex and year of discharge as a random-effect variable. Four independent models, each including the variable of interest on a categorical scale adjusted for the others on a continuous scale.



1  
2  
3 Lastly, figure 2 describes the time series of incidence analysed using Poisson non-parametric generalised  
4 additive models. Left plot displays the downward trend in the annual age-and sex-adjusted incidence rates,  
5 which shows very narrow confidence interval because the very large size of the study population. This  
6 downward trend disappeared after additionally adjusting for the four explanatory variables (Figure 2, right  
7 plot), which shows that the decrease was due to the effect of these same variables. From 2004 onwards,  
8 however, the declining trend remained in evidence even after adjustment was made for use of preventive  
9 drug therapy and prevalence of smoking, obesity and overweight.  
10  
11  
12  
13

## 14 15 16 17 18 **DISCUSSION**

19  
20 The results show that, after decades of continuous rises, hospitalisation due to incident IHD in the Spanish  
21 adult population fell after 1997, a drop that was associated with the decline in smoking and, in equal  
22 measure, with the increase in pharmacological treatment of vascular risk. This decrease in IHD  
23 hospitalisation rates could have been even greater, had it not been for the frequency of excessive weight,  
24 which not only failed to decline but actually rose. Overall, the factors analysed accounted for over 90% of the  
25 decrease in incident IHD hospitalisation rates. The decline occurred despite the increased sensitivity of  
26 diagnostic tests and the ensuing change in the IHD-definition criteria.[30]  
27  
28  
29  
30  
31  
32

33 The accuracy of the results is reinforced because the associations show a strong dose-response relationship  
34 and a correct temporality, with the effect being maintained in response to growing lags between exposure  
35 and disease. The associations found are biologically plausible, since both the role of smoking in the  
36 aetiology of coronary disease and the effect of drugs on vascular risk have been sufficiently proved by *in*  
37 *vitro* studies and clinical trials. Lastly, the results are in line with: what has been published with respect to the  
38 decreases in IHD mortality [15-21] and hospital morbidity recorded in other countries;[22-26] the decline in  
39 Spain in the incidence of smoking-related diseases such as asthma and lung cancer;[28] the reduction in  
40 mean population levels of serum cholesterol and systolic blood pressure;[21] and the increase in the rates of  
41 detection, treatment and control of vascular risk as documented by cross-sectional studies on the Spanish  
42 population.[31]  
43  
44  
45  
46  
47  
48  
49

50 The study shows the success of the smoking control strategies implemented in the 1990s,[32] based on  
51 legislative measures targeted at restricting the sale, raising the price and placing limitations on the  
52 advertising of cigarettes, information programmes about smoking-related risks, and anti-smoking campaigns.  
53 These measures were followed by a considerable decline in the frequency of active smoking, principally  
54 among light and moderate smokers.[28] The most recent legislative measures, aimed at preventing passive  
55 smoking, have not achieved such a marked decrease in active smoking prevalence. Our results suggest,  
56  
57  
58  
59  
60

1  
2  
3 however, that part of the decline in IHD incidence in the lattermost years of the study is not accounted for by  
4 the factors analysed, indicating, in turn, that this may be due to the decline in passive smoking resulting, not  
5 only from the cumulative reduction in active smoking itself in the years preceding the entry into force of these  
6 measures, but also from the direct impact of the first Anti-smoking Act. Different studies undertaken in Spain  
7 [33,34] and other countries [12,13] have shown the effect on IHD mortality and morbidity of a legal ban on  
8 smoking in the workplace.  
9

10  
11 The results support a primary prevention strategy based on pharmacological control of vascular risk.  
12 Evidence of the effectiveness of this strategy at a population level, which implies the mass use of medication,  
13 is especially important in an adverse economic context, and more so when the use of drugs for  
14 cardiovascular disease prevention in healthy persons has been the subject of controversy.[35] Specifically, in  
15 the case of the various statins, meta-analyses of clinical trials have yielded contradictory results,[36-40] with  
16 some authors being of the opinion that it is preferable to change the lifestyles of these patients. While this  
17 study does not purport to assess the clinical effect of these drugs, its results nonetheless show a statistically  
18 significant decrease in the age- and sex-adjusted hospitalisation rate associated with the use of both statins  
19 and hypertensive, antiplatelet and antidiabetic drugs. Although the presence of strong collinearity ruled out  
20 any analysis of the independent effect of each of these drugs with adjustment for remainder, their use  
21 considered jointly *did* show a strong protective effect, regardless of the effect of sex, age, smoking  
22 prevalence and excessive weight, a finding in line with the consideration that vascular risk is multifactorial  
23 and cannot be corrected by controlling the respective risk factors in isolation.[7] The appropriate balance  
24 between economic and health objectives by policies aimed at reducing pharmaceutical costs, such as those  
25 fostering the use of generic drugs or a gradual reduction in profit margins for producers and distributors,[41]  
26 have been decisive factors in this public health success. Even so, recent studies reveal that there is still  
27 much room for improvement in the detection, treatment and control of vascular risk.[31]  
28  
29  
30  
31  
32  
33  
34  
35  
36  
37

38 In contrast with smoking and control of vascular risk, prevalences of overweight and obesity, positively  
39 associated with incident IHD hospitalisation rates, increased across the study period, indicating that  
40 prevention based on promoting a healthy diet and physical exercise and changing obesogenic lifestyles is  
41 proving inadequate or ineffective, probably because the effects of these policies will only be seen in the  
42 longer term.[10] Without ignoring smoking prevention or therapeutic control of vascular risk, our results  
43 indicate that, from a public health stance, treatment and prevention of excess weight should be made a  
44 priority. Community interventions aimed at changing the prevalence of obesity and sedentarism are  
45 multidisciplinary, going beyond the strict scope of health care and involving multiple levels, such as  
46 education, the food sector, town planning and administration, provision of sports facilities, transport policy,  
47 etc.[11] Moreover, with the change of lifestyles many treatments could be avoided -and in this respect our  
48 sympathies are with those who advocate this- but, until such a time as a cost-effective means of changing  
49 the prevalence of obesity and sedentarism becomes available, the use of vascular prevention drug therapy is  
50 an inevitable strategy.  
51  
52  
53  
54  
55  
56  
57  
58  
59  
60

1  
2  
3 In the correct interpretation of the results of this study, some limitations must be borne in mind. Firstly, this  
4 study was based on health indicators and targeted at the assessment of public health; its results should not  
5 be extrapolated to the clinical sphere, i.e., to the clinical management of individual patients, and are thus not  
6 interpretable as outcomes of clinical or intervention trials, even though they may nuance the latter insofar as  
7 they provide an illustration of their external validity. Secondly, the results are exclusively applicable to cases  
8 of hospitalised incident IHD; having said this, however, the possibility that the decline in hospitalisations  
9 might be due to increases in pre-admission mortality can be conclusively ruled out because mortality rates  
10 due to sudden death or poorly defined causes not only decreased across the study period but they actually  
11 decreased to a greater extent.[2] Errors of measurement that are inherent in the ecological design and limit  
12 causal inference are of little relevance in this study, in view of the fact that, in all the factors considered,  
13 causality was clearly shown. Identification of incident cases was based on an estimate but the method used  
14 was validated, with high sensitivity and specificity values being obtained. What is more, the proportion of  
15 cases of acute infarction with previous clinical history in our series (26.6%) agrees with the results of the  
16 PRIAMHO II Registry,[42] in which 24% of cases were shown to have a history of previous infarction or  
17 revascularisation.  
18  
19  
20  
21  
22  
23  
24  
25  
26

27 The remaining potential study limitations stem from the nature of the available data and, were they to have  
28 some impact, would in all cases bias the results towards the null hypothesis and so tend to underestimate  
29 the effect. With respect to the exposure data studied, these were drawn from a self-report questionnaire  
30 without any objective measures of smoking, weight and height; and, while self-reported smoking data are  
31 regarded as valid, those on obesity and overweight may be underestimated. The data relating to drug use  
32 refer to total use: these drugs are prescribed, not only for primary prevention, but also for secondary  
33 prevention and treatment of other conditions, such as arrhythmias and heart failure. Nevertheless the  
34 frequency of these diseases is infinitely lower than the prevalence of vascular risk in the general adult  
35 population, and is indeed almost negligible in comparison. At all events, the error would, yet again, tend  
36 more towards overestimating exposure and, by extension, underestimating the effect. Lastly, specific dietary  
37 factors (i.e., fish, vegetables or alcoholic beverages), nutritional factors (i.e. fats) and physical activity factors  
38 were not analysed for reasons of parsimony; instead, the frequency of obesity and overweight was used as  
39 an indicator of quality of diet and physical activity as a whole.  
40  
41  
42  
43  
44  
45  
46  
47

48 In conclusion, after decades of continuous rises, incidence of IHD hospitalisation fell from 1997 onwards, a  
49 decline that was associated with the decrease in smoking and, in equal measure, with the increase in  
50 vascular risk drug therapy. The cumulative decline of 52% over 13 years might have been even greater if  
51 there had not been a concomitant increase in the prevalence of excessive weight, also associated with  
52 incidence. These results indicate that current IHD primary prevention strategies have been effective at a  
53 population level, thanks to an appropriate balance between financial and health goals, something that should  
54  
55  
56  
57  
58  
59  
60

1  
2  
3  
4  
5  
6  
7  
8  
9  
10  
11  
12  
13  
14  
15  
16  
17  
18  
19  
20  
21  
22  
23  
24  
25  
26  
27  
28  
29  
30  
31  
32  
33  
34  
35  
36  
37  
38  
39  
40  
41  
42  
43  
44  
45  
46  
47  
48  
49  
50  
51  
52  
53  
54  
55  
56  
57  
58  
59  
60

be left intact despite the current economic crisis. Future strategies should lay special stress on the prevention and treatment of excessive weight.

For peer review only

## Acknowledgement

The authors would like to thank Michael Benedict for his help with the English version of the manuscript.

## Competing Interests

The authors declare that they have no competing interests.

## Funding

This study was supported by Independent Clinical Research grant EC11-282 from the Ministry of Health, Social Services & Equality. The funders had no role in study design, data collection and analysis, decision to publish, or preparation of the manuscript. This research received no grants from any commercial sector.

## Figure legends

Figure 1. Annual trends in explanatory variables and incident ischaemic heart disease hospitalisation rates.

Figure 2. Time series of incidence analysed using non-parametric generalised additive models. Left plot: smoothed series adjusted for age and sex. Right plot: smoothed series adjusted for age, sex, prevalence of smoking, obesity and overweight, and use of cardiovascular disease prevention drug therapy. Solid lines represent the incidence rate ratios (IRRs) and dashed lines are the upper and lower limits of its 95% confidence interval.

## Author Contributions

MJM conceived of the study, its design and coordinated the research team. MJM, EA-C, CO, and IG performed the statistical analysis and interpretation of data and prepared the draft manuscript. All authors participated in the design of the study and in critical review of the manuscript. All authors read and approved the final manuscript.

## Data sharing

Technical appendix and supplementary material available online. Individual patient datasets are protected by Spanish regulations; these may be obtained from the Spanish Ministry of Health and the National Institute of Statistics under specific data loan agreements.

## REFERENCES

1. Marrugat J, Elosua R, Aldasoro E, et al. Regional variability in population acute myocardial infarction cumulative incidence and mortality rates in Spain 1997 and 1998. *Eur J Epidemiol* 2004;**19**(9):831-9.
2. Instituto Nacional de Estadística. Defunciones según la causa de muerte. Madrid: INE Available from: URL: <http://www.ine.es/jaxi/menu.do?type=pcaxis&path=/t15/p417&file=inebase&L=0> (accessed 23 May 2013).
3. Medrano-Albero MJ, Boix-Martinez R, Cerrato-Crespan E, et al. [Incidence and prevalence of ischaemic heart disease and cerebrovascular disease in Spain: a systematic review of the literature]. *Rev Esp Salud Publica* 2006;**80**(1):5-15.
4. Madrid: Ministerio de Sanidad y Consumo. Estrategia frente a la Cardiopatía Isquémica del Sistema Nacional de Salud. 2006.
5. Brotons C, Royo-Bordonada MA, Alvarez-Sala L, et al. [Spanish adaptation of the European Guidelines on Cardiovascular Disease Prevention]. *Rev Esp Salud Publica* 2004;**78**(4):435-8.
6. Graham I, Atar D, Borch-Johnsen K, et al. Guías de práctica clínica sobre prevención de la enfermedad cardiovascular: versión resumida. *Rev Esp Cardiol* 2008;**61**(1):e1-e49.
7. Pearson TA, Blair SN, Daniels SR, et al. AHA Guidelines for Primary Prevention of Cardiovascular Disease and Stroke: 2002 Update: Consensus Panel Guide to Comprehensive Risk Reduction for Adult Patients Without Coronary or Other Atherosclerotic Vascular Diseases. American Heart Association Science Advisory and Coordinating Committee. *Circulation* 2002;**106**(3):388-91.
8. Marrugat J, D'Agostino R, Sullivan L, et al. An adaptation of the Framingham coronary heart disease risk function to European Mediterranean areas. *J Epidemiol Community Health* 2003;**57**(8):634-8.
9. Conroy RM, Pyorala K, Fitzgerald AP, et al. Estimation of ten-year risk of fatal cardiovascular disease in Europe: the SCORE project. *Eur Heart J* 2003;**24**(11):987-1003.
10. Ballesteros Arribas JM, Dal-Re Saavedra M, Perez-Farinos N, et al. [The Spanish strategy for nutrition, physical activity and the prevention of obesity (NAOS Strategy)]. *Rev Esp Salud Publica* 2007;**81**(5):443-9.
11. World Health Organization. The challenge of obesity in the WHO European Region and the strategies for response. Copenhagen, Denmark Europe: 2007 Available from: URL: [http://www.euro.who.int/\\_data/assets/pdf\\_file/0010/74746/E90711.pdf](http://www.euro.who.int/_data/assets/pdf_file/0010/74746/E90711.pdf) (accessed 23 May 2013).
12. Tan CE, Glantz SA. Association between smoke-free legislation and hospitalizations for cardiac, cerebrovascular, and respiratory diseases: a meta-analysis. *Circulation* 2012;**126**(18):2177-83.
13. Dove MS, Dockery DW, Mittleman MA, et al. The impact of Massachusetts' smoke-free workplace laws on acute myocardial infarction deaths. *Am J Public Health* 2010;**100**(11):2206-12.
14. Rothwell PM. External validity of randomised controlled trials: "to whom do the results of this trial apply?". *Lancet* 2005;**365**(9453):82-93.
15. Ford ES, Ajani UA, Croft JB, et al. Explaining the decrease in U.S. deaths from coronary disease, 1980-2000. *N Engl J Med* 2007;**356**(23):2388-98.
16. Laatikainen T, Critchley J, Vartiainen E, et al. Explaining the decline in coronary heart disease mortality in Finland between 1982 and 1997. *Am J Epidemiol* 2005;**162**(8):764-73.

17. Capewell S, Beaglehole R, Seddon M, et al. Explanation for the decline in coronary heart disease mortality rates in Auckland, New Zealand, between 1982 and 1993. *Circulation* 2000;**102**(13):1511-6.
18. Unal B, Critchley JA, Capewell S. Explaining the decline in coronary heart disease mortality in England and Wales between 1981 and 2000. *Circulation* 2004;**109**(9):1101-7.
19. Bjorck L, Rosengren A, Bennett K, et al. Modelling the decreasing coronary heart disease mortality in Sweden between 1986 and 2002. *Eur Heart J* 2009;**30**(9):1046-56.
20. Palmieri L, Bennett K, Giampaoli S, et al. Explaining the decrease in coronary heart disease mortality in Italy between 1980 and 2000. *Am J Public Health* 2010;**100**(4):684-92.
21. Flores-Mateo G, Grau M, O'Flaherty M, et al. [Analyzing the coronary heart disease mortality decline in a Mediterranean population: Spain 1988-2005]. *Rev Esp Cardiol* 2011;**64**(11):988-96.
22. Yeh RW, Sidney S, Chandra M, et al. Population trends in the incidence and outcomes of acute myocardial infarction. *N Engl J Med* 2010;**362**(23):2155-65.
23. Chen J, Normand SL, Wang Y, et al. Recent declines in hospitalizations for acute myocardial infarction for Medicare fee-for-service beneficiaries: progress and continuing challenges. *Circulation* 2010;**121**(11):1322-8.
24. Barchielli A, Balzi D, Naldoni P, et al. Hospital discharge data for assessing myocardial infarction events and trends, and effects of diagnosis validation according to MONICA and AHA criteria. *J Epidemiol Community Health* 2012;**66**(5):462-7.
25. Briffa T, Nedkoff L, Peeters A, et al. Discordant age and sex-specific trends in the incidence of a first coronary heart disease event in Western Australia from 1996 to 2007. *Heart* 2011;**97**(5):400-4.
26. Shalev V, Goldshtein I, Porath A, et al. Continuation of statin therapy and primary prevention of nonfatal cardiovascular events. *Am J Cardiol* 2012;**110**(12):1779-86.
27. Agencia Española de Medicamentos y Productos Sanitarios. Informes del Observatorio de Uso de Medicamentos. Madrid: AEMPS Available from: URL: <http://www.aemps.gob.es/medicamentosUsoHumano/observatorio/informes.htm> (accessed 23 Aug. 2012).
28. Ministerio de Sanidad Política Social e Igualdad. Portal Estadístico del SNS. Madrid: MSSSI Available from: URL: <http://www.msssi.gob.es/estadEstudios/estadisticas/sisInfSanSNS/home.htm> (accessed 23 Aug. 2012).
29. R: A language and environment for statistical computing [computer program]. Version 2.15.0. Vienna, Austria: R Foundation for Statistical Computing; 2012.
30. Alpert JS, Thygesen K, Antman E, et al. Myocardial infarction redefined--a consensus document of The Joint European Society of Cardiology/American College of Cardiology Committee for the redefinition of myocardial infarction. *J Am Coll Cardiol* 2000;**36**(3):959-69.
31. Grau M, Elosua R, Cabrera de Leon A, et al. [Cardiovascular risk factors in Spain in the first decade of the 21st Century, a pooled analysis with individual data from 11 population-based studies: the DARIOS study]. *Rev Esp Cardiol* 2011;**64**(4):295-304.
32. Ministerio de Sanidad Política Social e Igualdad. Protección de la salud: tabaco. Legislación, índice cronológico. Madrid: MSSSI Available from: URL: <http://www.msssi.gob.es/ciudadanos/proteccionSalud/tabaco/legislacion.htm> (accessed 23 May 2013).
33. Villalbi JR, Sanchez E, Benet J, et al. The extension of smoke-free areas and acute myocardial infarction mortality: before and after study. *BMJ Open* 2011;**1**(1):e000067.

- 1
- 2
- 3 34. Agüero F, Degano IR, Subirana I, et al. Impact of a partial smoke-free legislation on myocardial
- 4 infarction incidence, mortality and case-fatality in a population-based registry: the REGICOR Study.
- 5 *PLoS One* 2013;**8**(1):e53722.
- 6
- 7 35. Redberg RF, Katz MH. Healthy men should not take statins. *JAMA* 2012;**307**(14):1491-2.
- 8
- 9 36. Brugts JJ, Yetgin T, Hoeks SE, et al. The benefits of statins in people without established
- 10 cardiovascular disease but with cardiovascular risk factors: meta-analysis of randomised controlled
- 11 trials. *BMJ* 2009;**338**:b2376.
- 12
- 13 37. Ray KK, Seshasai SR, Erqou S, et al. Statins and all-cause mortality in high-risk primary prevention: a
- 14 meta-analysis of 11 randomized controlled trials involving 65,229 participants. *Arch Intern Med*
- 15 2010;**170**(12):1024-31.
- 16
- 17 38. Taylor F, Ward K, Moore TH, et al. Statins for the primary prevention of cardiovascular disease.
- 18 *Cochrane Database Syst Rev* 2011;(1):CD004816.
- 19
- 20 39. Thavendiranathan P, Bagai A, Brookhart MA, et al. Primary prevention of cardiovascular diseases with
- 21 statin therapy: a meta-analysis of randomized controlled trials. *Arch Intern Med* 2006;**166**(21):2307-13.
- 22
- 23 40. Vrečer M, Turk S, Drinovec J, et al. Use of statins in primary and secondary prevention of coronary
- 24 heart disease and ischemic stroke. Meta-analysis of randomized trials. *Int J Clin Pharmacol Ther*
- 25 2003;**41**(12):567-77.
- 26
- 27 41. Ministerio de Sanidad Política Social e Igualdad. Economía del Medicamento y Productos Sanitarios.
- 28 Madrid: MSSSI Available from: URL:
- 29 <http://www.msssi.gob.es/profesionales/farmacia/legislacion/economia/home.htm> (accessed 26 May
- 30 2013).
- 31
- 32 42. Aros F, Cunat J, Loma-Osorio A, et al. [Management of myocardial infarction in Spain in the year
- 33 2000. The PRIAMHO II study]. *Rev Esp Cardiol* 2003;**56**(12):1165-73.
- 34
- 35
- 36
- 37
- 38
- 39
- 40
- 41
- 42
- 43
- 44
- 45
- 46
- 47
- 48
- 49
- 50
- 51
- 52
- 53
- 54
- 55
- 56
- 57
- 58
- 59
- 60



1  
2  
3  
4  
5  
6  
7 **EFFECT OF CARDIOVASCULAR PREVENTION STRATEGIES ON INCIDENT CORONARY DISEASE**  
8 **HOSPITALISATION RATES IN SPAIN. AN ECOLOGICAL TIME SERIES ANALYSIS**  
9

10  
11  
12  
13  
14 **Authors**

15  
16 *María José Medrano, Enrique Alcalde-Cabero, Cristina Ortiz, Iñaki Galán.*  
17  
18

19  
20 **Author affiliations**

21  
22 National Centre for Epidemiology, Carlos III Institute of Health, Madrid, Spain.  
23  
24

25  
26 **Corresponding author**

27 MJ Medrano

28  
29 Centro Nacional de Epidemiología

30  
31 Instituto de Salud Carlos III

32  
33 C/ Sinesio Delgado, 6

34  
35 28029 Madrid, Spain

36  
37 [pmedrano@isciii.es](mailto:pmedrano@isciii.es)

38  
39 Phone: 34918222639

40  
41 Fax: 34913877816  
42  
43

44 **Key words**

45  
46 Coronary heart disease. Prevention. Public Health  
47

48 **Word count:** 3975  
49  
50  
51  
52  
53  
54  
55  
56  
57  
58  
59  
60

**ABSTRACT**

**Objective:** To assess the overall population impact of primary prevention strategies (promotion of healthy lifestyles, prevention of smoking and use of vascular risk drug therapy) of coronary disease in Spain.

**Design:** Ecological time series analysis, 1982 to 2009.

**Setting:** All public and private hospitals in Spain.

**Participants:** General population.

**Outcome:** Incident coronary disease hospitalization as derived from official hospital discharge data.

**Methods:** Annual hospitalisation rates were modelled according to nationwide use of statins, antihypertensive, antidiabetic and antiplatelet drugs, and prevalences of smoking, obesity and overweight. Additive generalised models and mixed Poisson regression models were used for the purpose, taking year as the random-effect variable and adjusting for age, sex, prevalence of vascular risk factors, and hospital beds in intensive and coronary care units.

**Results:** Across 28 years and 671.5 million persons-year of observation, there were 2,986,834 hospitalisations due to coronary disease; of these, 1,441,980 (48.28%) were classified as incident. Hospitalisation rates increased from 1982 to 1996, with an inflection point in 1997 and a subsequent 52% decrease until 2009. Prevalences of smoking, obesity, overweight and use of vascular risk drug therapy were significantly associated with hospitalisation rates ( $p < 0.001$ ): incidence rates ratios (95% CI) for the fourth versus the first quartile were 1.46 (1.42-1.50), 1.80 (1.78-1.83), 1.58 (1.55-1.60) and 0.57 (0.51-0.63) respectively. These variables accounted for 92% of interannual variability.

**Conclusion:** After decades of continuous rises, hospitalisation due to incident IHD has been cut by half, an achievement associated with the decline in smoking and the increase in vascular risk drug therapy. These results indicate that these two primary prevention strategies have been effective at a population level, thanks to an appropriate balance between financial and health goals, something that should be left intact despite the current economic crisis. Future strategies ought to lay special stress on excessive body weight prevention.

## STRENGTHS AND LIMITATIONS OF THIS STUDY

• The study shows that the decline in coronary disease in Spain was associated with the exponential increase in pharmacological treatment of vascular risk, together with the decline in active smoking that followed the strong interventions against tobacco use implemented in mid and late '90s. This decrease in IHD hospitalisation rates could have been even greater, had it not been for the frequency of excessive weight, which not only failed to decline but actually rose.

• The exposure-effect associations found: 1- are of great magnitude; 2- show a strong dose-response relationship; 3-show a correct temporality; 4- are biologically plausible; and 5- are consistent with similar studies in other countries, with trends in other tobacco-related diseases and with the increase in the rates of detection, treatment and control of vascular risk factors in Spain.

• The results are relevant as some of these measures (i.e. broad use of statins in general population) are still controversial. Moreover, the results may substantially affect public health policy, especially in a context of financial crisis.

• This is an ecological study based on health indicators and targeted at the assessment of public health; its results should not be interpreted as outcomes of intervention trials, even though they may nuance the latter insofar as they provide an illustration of their external validity.

## INTRODUCTION

Ischaemic heart disease (IHD) is a severe disease, is lethal in its acute form in 20%-30% of cases [1] – indeed, it is the leading cause of death in men and the second leading cause of death in women in Spain [2]– and is chronically incapacitating in a great proportion of survivors. Its frequency in the Spanish population is high, with population incidence being estimated at 207 and 45/100,000 in men and women respectively, and hospitalisations at 140,000 cases annually.[3] Consequently, this situation became a public health priority and the target of specific health-planning strategies at a national level.[4]

The main vascular risk factors (excessive body weight, smoking habit, hypercholesterolaemia, arterial hypertension and diabetes mellitus) can be modified by changes in lifestyle or therapeutic interventions. In recent years, cardiovascular disease prevention has therefore been the focus of a major collective effort, in which health professionals as well as scientific societies, the pharmaceutical industry and health administrations have all taken part. The pillars of IHD prevention have been prevention of smoking, promotion of healthy lifestyles, and detection, treatment and medical control of arterial hypertension, hypercholesterolaemia, diabetes mellitus and platelet aggregation in high risk patients.[4,5] These strategies have been generally implemented throughout the Spanish National Health System, as a result of recommendations made by the respective health authorities,[4] prevention guidelines drawn up by experts and scientific societies both domestic and international,[5-7] and the development of risk functions which not only enable patients to be stratified according to their individual coronary risk, estimated on the basis of vascular risk factors taken jointly,[8,9] but also serve as a guide when it comes to making therapeutic decisions about controlling vascular risk.

The promotion of healthy habits has specifically centred on diet and physical exercise.[10] Prevalence of obesity and overweight is regarded as an indicator of inadequate diet and physical activity.[4,11] With respect to smoking, the impact of anti-smoking interventions on coronary risk has been comprehensively described at both an individual and a population level. Hence, assessment of epidemiological anti-smoking legislation in a number of countries has shown its effectiveness in terms of IHD mortality and morbidity.[12,13] Lastly, the use of cardiovascular disease prevention drug therapy in healthy persons has demonstrated its effectiveness at an individual level in many clinical trials, though it is not known whether this effectiveness has been reflected at a population level, i.e., its epidemiological impact. Clinical trials are conducted under controlled experimental conditions and the patients included are selected on the basis of strict inclusion and exclusion criteria. Consequently, such studies do not represent the general population and their results may possibly not be seen at a population level (external validity).[14]

To our knowledge, there is no study that has assessed the joint impact of these cardiovascular disease prevention measures on IHD incidence. Epidemiological studies undertaken in different countries,[15-20] including Spain,[21] have linked the decrease in cardiovascular and ischaemic heart disease mortality to the decline in population levels of vascular risk factors. In Spain, 50% of the reduction in coronary mortality is estimated to be due to changes in risk factors, essentially total cholesterol (close on 31% of the fall in

1  
2  
3 mortality) and systolic blood pressure (15%).[21] Most of these studies have, however, been based on  
4 IMPACT methodology,[17,18] which was designed to assess changes in mortality but has not been adapted  
5 to the task of assessing morbidity. Recent studies in the USA,[22,23] Italy [24] and Australia [25] have  
6 reported a decrease in IHD-related hospital morbidity, which was linked to anti-smoking legislation and the  
7 use of cardioprotective medication, though these associations were not statistically proved. Lastly, a recent  
8 population-based observational study in Israel [26] assessed the effect of continued use of statins on the  
9 incidence of acute infarction and coronary revascularisation but did not consider the effect of use of  
10 antihypertensive, antiplatelet or antidiabetic drugs.

11  
12  
13  
14  
15 Accordingly, the aim of this study was to describe the time trend in hospital incident-IHD-related morbidity  
16 rates and assess the impact of smoking prevention, promotion of healthy lifestyles and the use of  
17 cardiovascular disease prevention drug therapy, using the following as indicators: population prevalence of  
18 smoking; prevalence of obesity and overweight; and use of statins and antihypertensive, antiplatelet and  
19 antidiabetic drugs.  
20  
21

## 22 23 24 25 **METHODS**

26  
27  
28 We conducted an epidemiological assessment study into the impact of preventive measures using  
29 regression analysis and time-series modelling and, for study purposes, including the total Spanish population  
30 over 29 years of age. The period considered in the description of the time series was 1982 to 2009, avoiding  
31 the years preceding the entry into force of the International Classification of Diseases, 9<sup>th</sup> Revision, Clinical  
32 Modification (ICD-9-CM). In the analysis of related factors, the series was restricted to the period 1996–2006,  
33 since this was the period for which data on all the explanatory variables were available.  
34  
35

### 36 37 38 **1- Principal and secondary variables. Data-sources.**

39 The outcome variable was frequency of hospitalisation due to incident IHD (ICD-9-CM codes 410-414, with  
40 four digits), expressed **in descriptive analyses** in the form of annual age-adjusted rates according to the  
41 Standard European Population. Data on hospital discharges due to this cause were drawn from anonymised  
42 MBDS microfiches (Minimum Basic Data Set/*Conjunto Mínimo Básico de Datos*, the official nation-wide  
43 administrative and statistical database which includes clinical and demographic data on every hospital  
44 discharge, obtained from the pertinent medical records), and were completed with a patient discharge  
45 sample from some private hospitals that were not included in the MBDS. The fiches were supplied by the  
46 National Statistics Institute (NSI) (*Instituto Nacional de Estadística*) under a data loan agreement containing  
47 an undertaking of confidentiality and respect for statistical secrecy. Population data for calculating the rates  
48 for each year, sex and age group were obtained from NSI intercensal estimates. **The age strata were 5-year**  
49 **age groups starting from 30 to 85 and older.**  
50  
51  
52  
53  
54

55 An incident event was defined as that in which the following two conditions were fulfilled: a) diagnosis at  
56 discharge of acute IHD, acute myocardial infarction, intermediate coronary syndrome (unstable angina) or  
57  
58

59  
60  
5

1  
2  
3 angina pectoris (ICD 410, 411 or 413); and, b) first admission due to IHD, as shown by a check for duplicate  
4 entries based on the fields, "sex", "date of birth" and "province of residence". Events for which control for  
5 duplicates could not be performed for lack of any record of the patient's complete date of birth (n= 91,176,  
6 3.1%), were excluded.  
7

8  
9  
10 The method used to control for duplicates was validated by comparing the results against data on 30,205  
11 hospitalisations in eight cities for which patient identification codes were available, yielding a sensitivity of  
12 97.88% and specificity of 88.73. The distribution by age, sex and diagnostic category of this validation  
13 sample did not differ from that of the study population.  
14

15  
16  
17 The variables considered as potentially explanatory of the trend in IHD hospitalisation rates in the population  
18 were:  
19

- 20  
21 - use of statins (atorvastatin, cerivastatin, fluvastatin, lovastatin, pravastatin and simvastatin);  
22 - use of antihypertensive drugs (angiotensin II receptor antagonists, angiotensin-converting enzyme  
23 inhibitors, betablockers, diuretics, calcium channel blockers and others);  
24 - use of platelet aggregation inhibitors (aspirin, carbasalate, clopidogrel, dipyridamol, citazol,  
25 ticlopidine and triflusal);  
26 - use of antidiabetic drugs (insulins, biguanides, sulphonylureas, alpha-glucosidase inhibitors,  
27 thiazolidinediones and combinations of these).  
28  
29

30 The use of these drugs was expressed in Defined Daily Doses (DDD) per 1,000 inhabitants per day  
31 (DHDs), for the period 1996-2006. These data were drawn from reports issued by the Spanish  
32 Medications & Health Products Agency on the basis of data on packages dispensed under and  
33 charged to the National Health System.[27] The methodology used is described in detail in these  
34 publications. DHDs divided by 10 were introduced into the models, with the estimators having to be  
35 interpreted as the effect for every increase of 10 units in the DHD.  
36  
37

- 38 - prevalence, with a breakdown by year, sex and age, of smoking, overweight, obesity, arterial  
39 hypertension, hypercholesterolaemia and diabetes mellitus obtained from self-report data in the  
40 1987,1993, 1995, 1997, 2001, 2003 and 2006 National Health Surveys,[28] with data for the  
41 intermediate years being estimated by means of linear interpolation of data for the pivotal years.  
42  
43 - Number of physically available hospital beds in intensive care and coronary care units per 1,000  
44 inhabitants.[28]  
45  
46  
47

## 48 2- Data-analysis

49 Weightings specified by the NSI were used for the calculation of the number of cases. In descriptive  
50 analyses, age-adjusted incident IHD hospitalisation rates (Standard European Population) were calculated  
51 for each year and sex. These rates were depicted graphically, as were the frequency measures of the  
52 remaining explanatory variables for each year.  
53  
54  
55

56  
57 The effect of the explanatory variables on incident IHD morbidity was estimated on the basis of incidence  
58  
59  
60

1  
2  
3 rates ratios (IRRs) derived from mixed Poisson regression models of fixed and random effects, with year  
4 being introduced as the random-effect variable, using the command 'xtmepoisson' implemented in Stata,  
5 that fits mixed-effects models for count responses assuming a Poisson distribution of the data. This approach  
6 enables one to control for both temporal autocorrelation and overdispersion, measure interannual variability  
7 explained by the preventive measures, and minimise the risk of residual confounding. The dependent  
8 variable was the number of incident hospitalisations in each sex and age stratum, and the national  
9 population figure of each stratum was introduced as the exposed population. This is equivalent to modelling  
10 of rates. The explanatory variables were sequentially introduced, successively obtaining age- and sex-  
11 adjusted estimators and multivariate estimators. We considered the concurrent effect across time of the  
12 explanatory variables and hospitalisation, plus the effect with lags of one, two and three years, so as to take  
13 into account the possible latency between exposure and its effect, and assess the temporality of the  
14 associations.  
15  
16  
17  
18  
19

20  
21 The effect of drug therapy for control of vascular risk was analysed for each type of drug (statins, and  
22 antihypertensive, antiplatelet and antidiabetic drugs), both individually and jointly, using the variable "drug  
23 use for control of vascular risk" obtained by adding together the respective usages of each type to avoid the  
24 strong collinearity that characterises the consumption of such drugs (correlation coefficients of 0.97 to 0.99).  
25 The explanatory variables categorised in quartiles were included in the models for dose-response analysis.  
26 These models were used to measure the interannual variability explained by the variables, calculated as 1  
27 minus the ratio between the variance of the random term in the complete model, and the variance of the  
28 random term in the model without prevention explanatory variables and in the model adjusted for age and  
29 sex.  
30  
31  
32  
33

34  
35 Lastly, the incidence time series was analysed and plotted graphically with the aid of Poisson non-parametric  
36 generalised additive models (GAMs) implemented in the mgcv library of the R statistical package version  
37 2.15.0 (2012-03-30).[29] GAM models allow to graphically depict the relationship including both smoothing  
38 and also a non-parametric fit, with no a priori assumptions on the actual relationship between response and  
39 predictor. As time is used as the predictor, the result is a smoothed time series of the response. The rates  
40 were modelled and smoothed by reference to time, and the smoothed age- and sex-adjusted series were  
41 depicted graphically. The explanatory variables were subsequently included in these models to depict the  
42 trends not due to these variables.  
43  
44  
45

46  
47 (See technical appendix in supplementary material for theoretical basis of models and technical details)  
48  
49

## 50 RESULTS

51  
52 Across the 28 years and 671.5 million persons-year of observation, there were 2,986,834 hospitalisations in  
53 Spain due to IHD; and of these, 1,441,980 (66.7% men and 33.3% women), accounting for 48.28% of the  
54 total, were classified as incident. Mean age at admission was  $65.9 \pm 12.8$  years, with a higher frequency in  
55 the 60- to 74-year age group (41.9%). Diagnosis at discharge was acute infarction in 55%, unstable angina  
56  
57  
58  
59  
60

in 14.7%, and stable angina in 30.3% of cases. Women's mean age was 5 years older ( $p < 0.001$ ), and the over-74-year age group was far more frequent among women than among men (data not shown in tables).

The annual age-adjusted incident IHD hospitalisation rates per 100,000, which are depicted graphically in Figure 1, show a rise from 1982 to 1996, a sharp inflection in 1997 and a subsequent cumulative decrease of 52.0% until 2009 (53.5% and 49.6% in men and women respectively). The decline was constant throughout the period, save for a slight increase in 2000, coinciding with the change in the definition of ischaemic heart disease. The distribution by sex of the incidence rates changed across the study period, with a decrease in the male/female ratio from 3.3 to 2.4.

Of the total study period (1982-2009), data on indicators of cardiovascular disease prevention (prevalence of smoking, prevalence of obesity and overweight, and use of drug therapy for control of vascular risk) were available for the period 1996-2006. These years witnessed a rise in the use of statins (948.9%) and antihypertensive (95.4%), antiplatelet (105%) and antidiabetic drugs (142%), and a decline in smoking prevalence (6.8% in women and 23.8% in men). Prevalence of obesity increased by 40% (Table 1, Figure 1).

**Table 1. Annual trends in explanatory variables in Spanish general population.**

|                                                                                                           | 1996  | 1997  | 1998  | 1999  | 2000  | 2001  | 2002  | 2003  | 2004  | 2005  | 2006  |
|-----------------------------------------------------------------------------------------------------------|-------|-------|-------|-------|-------|-------|-------|-------|-------|-------|-------|
| Proportion (%) Smokers                                                                                    | 31,9  | 32,0  | 31,8  | 31,6  | 31,4  | 31,2  | 29,8  | 28,4  | 27,9  | 27,8  | 27,6  |
| Proportion (%) Obesity                                                                                    | 15,1  | 16,1  | 16,1  | 16,2  | 16,3  | 16,3  | 16,2  | 16,0  | 16,7  | 17,3  | 17,9  |
| Proportion (%) Overweight                                                                                 | 41,0  | 40,3  | 40,6  | 41,0  | 41,4  | 41,8  | 41,2  | 40,6  | 40,7  | 40,7  | 40,8  |
| Drugs for control of vascular risk.<br>No. of Defined Daily Doses* per<br>1000 inhabitants per day (x10). |       |       |       |       |       |       |       |       |       |       |       |
| Total                                                                                                     | 171,5 | 185,6 | 204,9 | 227,7 | 253,8 | 279,2 | 303,0 | 329,7 | 359,6 | 377,7 | 412,3 |
| Statins                                                                                                   | 7,8   | 9,4   | 14,3  | 19,7  | 24,4  | 30,4  | 38,0  | 48,7  | 60,1  | 69,2  | 81,3  |
| Antihypertensive drugs                                                                                    | 119,2 | 127,6 | 136,6 | 148,4 | 163,8 | 175,7 | 186,9 | 197,1 | 210,2 | 215,7 | 232,9 |
| Antidiabetic drugs                                                                                        | 27,0  | 28,9  | 32,3  | 35,6  | 39,1  | 43,2  | 46,0  | 48,9  | 51,7  | 53,3  | 55,7  |
| Antiplatelet drugs                                                                                        | 17,5  | 19,6  | 21,7  | 24,0  | 26,6  | 29,9  | 32,2  | 35,0  | 37,6  | 39,5  | 42,4  |

DDD: number of doses (adult average maintenance dose per day) prescribed and sold in the National Health System

Consumption of statins and antihypertensive, antiplatelet and antidiabetic drugs, individually considered, displayed an inverse and statistically significant relationship with incident IHD hospitalisation rates in models adjusted for age, sex and prevalences of smoking, obesity and overweight (Table 2), and this association became progressively greater when growing lags were taken into account. Similarly, the use of drugs



1  
2  
3 considered jointly was inversely associated (IRR 0.97, 95% CI 0.97-0.98) with IHD incidence. The greater  
4 magnitude of the effect of drug use when considered individually rather than jointly should not be construed  
5 as a discrepancy: instead, this is attributable both to the difference in scale, and to drug associations and the  
6 lack of adjustment among the individual drug usages due to collinearity. In contrast, prevalence of smoking  
7 and that of obesity and overweight were both positively associated with incidence of hospitalisation due to  
8 IHD. In the models in which adjustment was additionally made for prevalences of arterial hypertension,  
9 hypercholesterolaemia and diabetes mellitus, and for the number of physically available beds in intensive  
10 and coronary care units, the above associations were not substantially modified, i.e., the effect of frequency  
11 of smoking was not modified, the effect of frequency of obesity and overweight was slightly attenuated, and  
12 the inverse association with drug use was slightly accentuated, both when the respective types of drugs were  
13 considered individually and when they were considered jointly.  
14  
15  
16  
17  
18

19 Furthermore, these associations displayed a statistically significant dose-response relationship in the models  
20 adjusted for sex, age, the variables in the table, and year as a random-effect variable (Table 3): whereas the  
21 IRR of smoking prevalence in the fourth versus the first quartile was 1.46 (95%CI 1.42-1.50) and the IRRs for  
22 prevalence of obesity and overweight were 1.80 (1.78-1.83) and 1.58 (1.55-1.60) respectively, the IRR for  
23 cardiovascular disease prevention drug therapy was 0.57 (0.51-0.63). The linear trend was statistically  
24 significant for all four variables. The protective effect of cardiovascular disease prevention drug therapy was  
25 slightly attenuated when the growing lags between exposure and effect were taken into account (IRR lag 0=  
26 0.57 (0.51-0.63) / IRR lag 3=0.61 (0.57-0.66)). Similarly, while the association with prevalence of overweight  
27 was attenuated over time, the association was not modified when the growing lags between exposure and  
28 effect for prevalences of obesity and smoking habit were taken into account.  
29  
30  
31  
32

33 The interannual variability in hospitalisation rates explained by the models considering the four variables  
34 simultaneously (continuous scale) was: 92% for no lag between exposure and effect; 95% for a lag of one  
35 year; 97% for a lag of two years; and 94% for a lag of three years (data not shown in tables). **The proportion  
36 of variability in annual rates explained by prevention variables raised from 92% with respect to the empty  
37 model, to 97% when calculated with respect to the model adjusted by age and sex, thus meaning a 5%  
38 variability in hospitalisation rates due to changes in age-sex population structure from 1996 to 2006.**  
39  
40  
41  
42  
43  
44  
45  
46  
47  
48  
49  
50  
51  
52  
53  
54  
55  
56  
57  
58  
59  
60

Table 2. Effect of prevalence of smoking habit, obesity, overweight and use of cardiovascular disease prevention drug therapy on incident ischaemic heart disease hospitalisation rates on annual incident ischaemic heart disease hospitalisation rates 1996-2006. Models for exposure-effect lags of 0, 1, 2 and 3 years.

|                                                                                   | Lag0 |             | Lag1 |             | Lag2 |             | Lag3 |             |
|-----------------------------------------------------------------------------------|------|-------------|------|-------------|------|-------------|------|-------------|
|                                                                                   | IRR  | 95%CI       | IRR  | 95%CI       | IRR  | 95%CI       | IRR  | 95%CI       |
| <i>1. Adjustment for age, sex, year (random variable) and specified variables</i> |      |             |      |             |      |             |      |             |
| % Smokers                                                                         | 1.02 | (1.01-1.02) | 1.02 | (1.02-1.02) | 1.02 | (1.02-1.02) | 1.02 | (1.02-1.02) |
| % Obesity                                                                         | 1.05 | (1.04-1.05) | 1.05 | (1.05-1.05) | 1.05 | (1.05-1.05) | 1.06 | (1.05-1.06) |
| % Overweight                                                                      | 1.04 | (1.04-1.04) | 1.04 | (1.04-1.04) | 1.03 | (1.03-1.04) | 1.03 | (1.03-1.03) |
| Drug use (x10 DHDs*)¶                                                             | 0.97 | (0.97-0.98) | 0.97 | (0.97-0.97) | 0.97 | (0.97-0.97) | 0.97 | (0.96-0.97) |
| Statins¶                                                                          | 0.92 | (0.91-0.93) | 0.91 | (0.90-0.92) | 0.90 | (0.88-0.91) | 0.87 | (0.85-0.90) |
| Antihypertensive drugs¶                                                           | 0.95 | (0.94-0.95) | 0.94 | (0.94-0.95) | 0.94 | (0.94-0.94) | 0.93 | (0.93-0.94) |
| Antidiabetic drugs¶                                                               | 0.81 | (0.79-0.83) | 0.81 | (0.79-0.83) | 0.80 | (0.79-0.81) | 0.78 | (0.77-0.79) |
| Antiplatelet drugs¶                                                               | 0.77 | (0.76-0.79) | 0.77 | (0.75-0.79) | 0.75 | (0.74-0.77) | 0.72 | (0.70-0.74) |
| <i>2. Multivariate adjustment:**</i>                                              |      |             |      |             |      |             |      |             |
| % Smokers                                                                         | 1.01 | (1.01-1.01) | 1.02 | (1.01-1.02) | 1.02 | (1.02-1.02) | 1.02 | (1.02-1.02) |
| % Obesity                                                                         | 1.03 | (1.03-1.03) | 1.03 | (1.03-1.04) | 1.03 | (1.03-1.04) | 1.03 | (1.03-1.04) |
| % Overweight                                                                      | 1.03 | (1.03-1.03) | 1.03 | (1.03-1.03) | 1.03 | (1.02-1.03) | 1.03 | (1.03-1.03) |
| Drug use (10 DHDs*)¶                                                              | 0.96 | (0.96-0.97) | 0.96 | (0.96-0.97) | 0.96 | (0.96-0.96) | 0.96 | (0.96-0.96) |
| Statins¶                                                                          | 0.90 | (0.89-0.91) | 0.89 | (0.88-0.90) | 0.87 | (0.86-0.89) | 0.85 | (0.83-0.87) |
| Antihypertensive drugs¶                                                           | 0.92 | (0.91-0.93) | 0.92 | (0.91-0.93) | 0.92 | (0.92-0.93) | 0.92 | (0.92-0.93) |
| Antidiabetic drugs¶                                                               | 0.73 | (0.68-0.77) | 0.74 | (0.71-0.77) | 0.75 | (0.73-0.77) | 0.75 | (0.74-0.75) |
| Antiplatelet drugs¶                                                               | 0.70 | (0.66-0.73) | 0.70 | (0.67-0.73) | 0.70 | (0.68-0.71) | 0.68 | (0.67-0.70) |

\* DHDs: No. of Defined Daily Doses per 1000 inhabitants per day.\*\* Adjusted for variables specified in the table plus age, sex, year of discharge as a random-effect variable, prevalence (%) of arterial hypertension, prevalence (%) of hypercholesterolaemia, prevalence (%) of mellitus diabetes, and number of hospital beds in intensive care and coronary care units.¶ Not adjusted among themselves because collinearity.

Table 3. Dose-response analysis of the effect of prevalence of smoking habit, obesity, overweight and use of cardiovascular disease prevention drug therapy on incident ischaemic heart disease hospitalisation rates. Models for exposure-effect lags of 0, 1, 2 and 3 years.

|                          | Lag0  |             | Lag1  |             | Lag2  |             | Lag3  |             |
|--------------------------|-------|-------------|-------|-------------|-------|-------------|-------|-------------|
|                          | IRR** | 95%CI       | IRR** | 95%CI       | IRR** | 95%CI       | IRR** | 95%CI       |
| % Smokers                |       |             |       |             |       |             |       |             |
| 1 <sup>st</sup> quartile |       | 1.00        |       | 1.00        |       | 1.00        |       | 1.00        |
| 2 <sup>nd</sup> quartile | 0.92  | (0.91-0.93) | 0.91  | (0.90-0.93) | 0.92  | (0.91-0.94) | 0.93  | (0.91-0.94) |
| 3 <sup>rd</sup> quartile | 1.23  | (1.21-1.25) | 1.21  | (1.19-1.23) | 1.20  | (1.18-1.22) | 1.18  | (1.15-1.20) |
| 4 <sup>th</sup> quartile | 1.46  | (1.42-1.50) | 1.48  | (1.44-1.52) | 1.50  | (1.46-1.55) | 1.49  | (1.45-1.54) |
| <i>P trend</i>           |       | <0.001      |       | <.0001      |       | < 0.001     |       | < 0.001     |
| % Obesity                |       |             |       |             |       |             |       |             |
| 1 <sup>st</sup> quartile |       | 1.00        |       | 1.00        |       | 1.00        |       | 1.00        |
| 2 <sup>nd</sup> quartile | 1.46  | (1.44-1.47) | 1.45  | (1.43-1.46) | 1.34  | (1.33-1.36) | 1.32  | (1.30-1.33) |
| 3 <sup>rd</sup> quartile | 1.71  | (1.69-1.73) | 1.65  | (1.63-1.67) | 1.53  | (1.51-1.55) | 1.48  | (1.46-1.50) |
| 4 <sup>th</sup> quartile | 1.80  | (1.78-1.83) | 1.82  | (1.79-1.85) | 1.75  | (1.73-1.79) | 1.86  | (1.78-1.90) |
| <i>P trend</i>           |       | <0.001      |       | <0.001      |       | <0.001      |       | <0.001      |
| % Overweight             |       |             |       |             |       |             |       |             |
| 1 <sup>st</sup> quartile |       | 1.00        |       | 1.00        |       | 1.00        |       | 1.00        |
| 2 <sup>nd</sup> quartile | 1.23  | (1.22-1.24) | 1.21  | (1.19-1.22) | 1.14  | (1.13-1.16) | 1.06  | (1.05-1.08) |
| 3 <sup>rd</sup> quartile | 1.41  | (1.39-1.43) | 1.35  | (1.33-1.37) | 1.30  | (1.28-1.31) | 1.22  | (1.20-1.24) |
| 4 <sup>th</sup> quartile | 1.58  | (1.55-1.60) | 1.50  | (1.47-1.52) | 1.43  | (1.41-1.45) | 1.33  | (1.31-1.36) |
| <i>P trend</i>           |       | <0.001      |       | <0.001      |       | <0.001      |       | <0.001      |
| Use of drugs (x10 DHDs*) |       |             |       |             |       |             |       |             |
| 1 <sup>st</sup> quartile |       | 1.00        |       | 1.00        |       | 1.00        |       | 1.00        |
| 2 <sup>nd</sup> quartile | 0.85  | (0.76-0.93) | 0.87  | (0.80-0.94) | 0.83  | (0.78-0.88) | 0.84  | (0.78-0.90) |
| 3 <sup>rd</sup> quartile | 0.71  | (0.65-0.79) | 0.73  | (0.68-0.79) | 0.71  | (0.67-0.75) | 0.70  | (0.65-0.75) |
| 4 <sup>th</sup> quartile | 0.57  | (0.51-0.63) | 0.59  | (0.55-0.64) | 0.62  | (0.58-0.66) | 0.61  | (0.57-0.66) |
| <i>P trend</i>           |       | < 0.001     |       | < 0.001     |       | < 0.001     |       | < 0.001     |

\* DHDs: No. of Defined Daily Doses per 1000 inhabitants per day. \*\* IRR adjusted for variables specified in the table plus age, sex and year of discharge as a random-effect variable. Four independent models, each including the variable of interest on a categorical scale adjusted for the others on a continuous scale.

1  
2  
3 Lastly, figure 2 describes the time series of incidence analysed using Poisson non-parametric generalised  
4 additive models. Left plot displays the downward trend in the annual age-and sex-adjusted incidence rates,  
5 which shows very narrow confidence interval because the very large size of the study population. This  
6 downward trend disappeared after additionally adjusting for the four explanatory variables (Figure 2, right  
7 plot), which shows that the decrease was due to the effect of these same variables. From 2004 onwards,  
8 however, the declining trend remained in evidence even after adjustment was made for use of preventive  
9 drug therapy and prevalence of smoking, obesity and overweight.  
10  
11  
12  
13  
14  
15  
16  
17  
18  
19

## DISCUSSION

20  
21 The results show that, after decades of continuous rises, hospitalisation due to incident IHD in the Spanish  
22 adult population fell after 1997, a drop that was associated with the decline in smoking and, in equal  
23 measure, with the increase in pharmacological treatment of vascular risk. This decrease in IHD  
24 hospitalisation rates could have been even greater, had it not been for the frequency of excessive weight,  
25 which not only failed to decline but actually rose. Overall, the factors analysed accounted for over 90% of the  
26 decrease in incident IHD hospitalisation rates. The decline occurred despite the increased sensitivity of  
27 diagnostic tests and the ensuing change in the IHD-definition criteria.[30]  
28  
29  
30  
31  
32

33 The accuracy of the results is reinforced because the associations show a strong dose-response relationship  
34 and a correct temporality, with the effect being maintained in response to growing lags between exposure  
35 and disease. The associations found are biologically plausible, since both the role of smoking in the  
36 aetiology of coronary disease and the effect of drugs on vascular risk have been sufficiently proved by *in*  
37 *vitro* studies and clinical trials. Lastly, the results are in line with: what has been published with respect to the  
38 decreases in IHD mortality [15-21] and hospital morbidity recorded in other countries;[22-26] the decline in  
39 Spain in the incidence of smoking-related diseases such as asthma and lung cancer;[28] the reduction in  
40 mean population levels of serum cholesterol and systolic blood pressure;[21] and the increase in the rates of  
41 detection, treatment and control of vascular risk as documented by cross-sectional studies on the Spanish  
42 population.[31]  
43  
44  
45  
46  
47  
48  
49

50 The study shows the success of the smoking control strategies implemented in the 1990s,[32] based on  
51 legislative measures targeted at restricting the sale, raising the price and placing limitations on the  
52 advertising of cigarettes, information programmes about smoking-related risks, and anti-smoking campaigns.  
53 These measures were followed by a considerable decline in the frequency of active smoking, principally  
54 among light and moderate smokers.[28] The most recent legislative measures, aimed at preventing passive  
55 smoking, have not achieved such a marked decrease in active smoking prevalence. Our results suggest,  
56  
57  
58  
59  
60

1  
2  
3 however, that part of the decline in IHD incidence in the lattermost years of the study is not accounted for by  
4 the factors analysed, indicating, in turn, that this may be due to the decline in passive smoking resulting, not  
5 only from the cumulative reduction in active smoking itself in the years preceding the entry into force of these  
6 measures, but also from the direct impact of the first Anti-smoking Act. Different studies undertaken in Spain  
7 [33,34] and other countries [12,13] have shown the effect on IHD mortality and morbidity of a legal ban on  
8 smoking in the workplace.  
9  
10

11  
12 The results support a primary prevention strategy based on pharmacological control of vascular risk.  
13 Evidence of the effectiveness of this strategy at a population level, which implies the mass use of medication,  
14 is especially important in an adverse economic context, and more so when the use of drugs for  
15 cardiovascular disease prevention in healthy persons has been the subject of controversy.[35] Specifically, in  
16 the case of the various statins, meta-analyses of clinical trials have yielded contradictory results,[36-40] with  
17 some authors being of the opinion that it is preferable to change the lifestyles of these patients. While this  
18 study does not purport to assess the clinical effect of these drugs, its results nonetheless show a statistically  
19 significant decrease in the age- and sex-adjusted hospitalisation rate associated with the use of both statins  
20 and hypertensive, antiplatelet and antidiabetic drugs. Although the presence of strong collinearity ruled out  
21 any analysis of the independent effect of each of these drugs with adjustment for remainder, their use  
22 considered jointly *did* show a strong protective effect, regardless of the effect of sex, age, smoking  
23 prevalence and excessive weight, a finding in line with the consideration that vascular risk is multifactorial  
24 and cannot be corrected by controlling the respective risk factors in isolation.[7] The appropriate balance  
25 between economic and health objectives by policies aimed at reducing pharmaceutical costs, such as those  
26 fostering the use of generic drugs or a gradual reduction in profit margins for producers and distributors,[41]  
27 have been decisive factors in this public health success. Even so, recent studies reveal that there is still  
28 much room for improvement in the detection, treatment and control of vascular risk.[31]  
29  
30  
31  
32  
33  
34  
35  
36  
37  
38

39 In contrast with smoking and control of vascular risk, prevalences of overweight and obesity, positively  
40 associated with incident IHD hospitalisation rates, increased across the study period, indicating that  
41 prevention based on promoting a healthy diet and physical exercise and changing obesogenic lifestyles is  
42 proving inadequate or ineffective, probably because the effects of these policies will only be seen in the  
43 longer term.[10] Without ignoring smoking prevention or therapeutic control of vascular risk, our results  
44 indicate that, from a public health stance, treatment and prevention of excess weight should be made a  
45 priority. Community interventions aimed at changing the prevalence of obesity and sedentarism are  
46 multidisciplinary, going beyond the strict scope of health care and involving multiple levels, such as  
47 education, the food sector, town planning and administration, provision of sports facilities, transport policy,  
48 etc.[11] Moreover, with the change of lifestyles many treatments could be avoided -and in this respect our  
49 sympathies are with those who advocate this- but, until such a time as a cost-effective means of changing  
50 the prevalence of obesity and sedentarism becomes available, the use of vascular prevention drug therapy is  
51 an inevitable strategy.  
52  
53  
54  
55  
56  
57  
58  
59  
60

1  
2  
3 In the correct interpretation of the results of this study, some limitations must be borne in mind. Firstly, this  
4 study was based on health indicators and targeted at the assessment of public health; its results should not  
5 be extrapolated to the clinical sphere, i.e., to the clinical management of individual patients, and are thus not  
6 interpretable as outcomes of clinical or intervention trials, even though they may nuance the latter insofar as  
7 they provide an illustration of their external validity. Secondly, the results are exclusively applicable to cases  
8 of hospitalised incident IHD; having said this, however, the possibility that the decline in hospitalisations  
9 might be due to increases in pre-admission mortality can be conclusively ruled out because mortality rates  
10 due to sudden death or poorly defined causes not only decreased across the study period but they actually  
11 decreased to a greater extent.[2] Errors of measurement that are inherent in the ecological design and limit  
12 causal inference are of little relevance in this study, in view of the fact that, in all the factors considered,  
13 causality was clearly shown. Identification of incident cases was based on an estimate but the method used  
14 was validated, with high sensitivity and specificity values being obtained. What is more, the proportion of  
15 cases of acute infarction with previous clinical history in our series (26.6%) agrees with the results of the  
16 PRIAMHO II Registry,[42] in which 24% of cases were shown to have a history of previous infarction or  
17 revascularisation.  
18  
19  
20  
21  
22  
23  
24  
25

26  
27 The remaining potential study limitations stem from the nature of the available data and, were they to have  
28 some impact, would in all cases bias the results towards the null hypothesis and so tend to underestimate  
29 the effect. With respect to the exposure data studied, these were drawn from a self-report questionnaire  
30 without any objective measures of smoking, weight and height; and, while self-reported smoking data are  
31 regarded as valid, those on obesity and overweight may be underestimated. The data relating to drug use  
32 refer to total use: these drugs are prescribed, not only for primary prevention, but also for secondary  
33 prevention and treatment of other conditions, such as arrhythmias and heart failure. Nevertheless the  
34 frequency of these diseases is infinitely lower than the prevalence of vascular risk in the general adult  
35 population, and is indeed almost negligible in comparison. At all events, the error would, yet again, tend  
36 more towards overestimating exposure and, by extension, underestimating the effect. Lastly, specific dietary  
37 factors (i.e., fish, vegetables or alcoholic beverages), nutritional factors (i.e. fats) and physical activity factors  
38 were not analysed for reasons of parsimony; instead, the frequency of obesity and overweight was used as  
39 an indicator of quality of diet and physical activity as a whole.  
40  
41  
42  
43  
44  
45  
46  
47

48 In conclusion, after decades of continuous rises, incidence of IHD hospitalisation fell from 1997 onwards, a  
49 decline that was associated with the decrease in smoking and, in equal measure, with the increase in  
50 vascular risk drug therapy. The cumulative decline of 52% over 13 years might have been even greater if  
51 there had not been a concomitant increase in the prevalence of excessive weight, also associated with  
52 incidence. These results indicate that current IHD primary prevention strategies have been effective at a  
53 population level, thanks to an appropriate balance between financial and health goals, something that should  
54  
55  
56  
57  
58  
59  
60

1  
2  
3 be left intact despite the current economic crisis. Future strategies should lay special stress on the  
4 prevention and treatment of excessive weight.  
5  
6  
7  
8  
9  
10  
11  
12  
13  
14  
15  
16  
17  
18  
19  
20  
21  
22  
23  
24  
25  
26  
27  
28  
29  
30  
31  
32  
33  
34  
35  
36  
37  
38  
39  
40  
41  
42  
43  
44  
45  
46  
47  
48  
49  
50  
51  
52  
53  
54  
55  
56  
57  
58  
59  
60

For peer review only

## Acknowledgement

The authors would like to thank Michael Benedict for his help with the English version of the manuscript.

## Competing Interests

The authors declare that they have no competing interests.

## Funding

This study was supported by Independent Clinical Research grant EC11-282 from the Ministry of Health, Social Services & Equality. The funders had no role in study design, data collection and analysis, decision to publish, or preparation of the manuscript. This research received no grants from any commercial sector.

## Figure legends

Figure 1. Annual trends in explanatory variables and incident ischaemic heart disease hospitalisation rates.

Figure 2. Time series of incidence analysed using non-parametric generalised additive models. Left plot: smoothed series adjusted for age and sex. Right plot: smoothed series adjusted for age, sex, prevalence of smoking, obesity and overweight, and use of cardiovascular disease prevention drug therapy. **Solid lines represent the incidence rate ratios (IRRs) and dashed lines are the upper and lower limits of its 95% confidence interval.**

## Author Contributions

MJM conceived of the study, its design and coordinated the research team. MJM, EA-C, CO, and IG performed the statistical analysis and interpretation of data and prepared the draft manuscript. All authors participated in the design of the study and in critical review of the manuscript. All authors read and approved the final manuscript.

## Data sharing

**Technical appendix and supplementary material available online.** Individual patient datasets are protected by Spanish regulations; these may be obtained from the Spanish Ministry of Health and the National Institute of Statistics under specific data loan agreements.



## REFERENCES

1. Marrugat J, Elosua R, Aldasoro E, et al. Regional variability in population acute myocardial infarction cumulative incidence and mortality rates in Spain 1997 and 1998. *Eur J Epidemiol* 2004;**19**(9):831-9.
2. Instituto Nacional de Estadística. Defunciones según la causa de muerte. Madrid: INE Available from: URL: <http://www.ine.es/jaxi/menu.do?type=pcaxis&path=/t15/p417&file=inebase&L=0> (accessed 23 May 2013).
3. Medrano-Albero MJ, Boix-Martinez R, Cerrato-Crespan E, et al. [Incidence and prevalence of ischaemic heart disease and cerebrovascular disease in Spain: a systematic review of the literature]. *Rev Esp Salud Publica* 2006;**80**(1):5-15.
4. Madrid: Ministerio de Sanidad y Consumo. Estrategia frente a la Cardiopatía Isquémica del Sistema Nacional de Salud. 2006.
5. Brotons C, Royo-Bordonada MA, Alvarez-Sala L, et al. [Spanish adaptation of the European Guidelines on Cardiovascular Disease Prevention]. *Rev Esp Salud Publica* 2004;**78**(4):435-8.
6. Graham I, Atar D, Borch-Johnsen K, et al. Guías de práctica clínica sobre prevención de la enfermedad cardiovascular: versión resumida. *Rev Esp Cardiol* 2008;**61**(1):e1-e49.
7. Pearson TA, Blair SN, Daniels SR, et al. AHA Guidelines for Primary Prevention of Cardiovascular Disease and Stroke: 2002 Update: Consensus Panel Guide to Comprehensive Risk Reduction for Adult Patients Without Coronary or Other Atherosclerotic Vascular Diseases. American Heart Association Science Advisory and Coordinating Committee. *Circulation* 2002;**106**(3):388-91.
8. Marrugat J, D'Agostino R, Sullivan L, et al. An adaptation of the Framingham coronary heart disease risk function to European Mediterranean areas. *J Epidemiol Community Health* 2003;**57**(8):634-8.
9. Conroy RM, Pyorala K, Fitzgerald AP, et al. Estimation of ten-year risk of fatal cardiovascular disease in Europe: the SCORE project. *Eur Heart J* 2003;**24**(11):987-1003.
10. Ballesteros Arribas JM, Dal-Re Saavedra M, Perez-Farinos N, et al. [The Spanish strategy for nutrition, physical activity and the prevention of obesity (NAOS Strategy)]. *Rev Esp Salud Publica* 2007;**81**(5):443-9.
11. World Health Organization. The challenge of obesity in the WHO European Region and the strategies for response. Copenhagen, Denmark Europe: 2007 Available from: URL: [http://www.euro.who.int/\\_data/assets/pdf\\_file/0010/74746/E90711.pdf](http://www.euro.who.int/_data/assets/pdf_file/0010/74746/E90711.pdf) (accessed 23 May 2013).
12. Tan CE, Glantz SA. Association between smoke-free legislation and hospitalizations for cardiac, cerebrovascular, and respiratory diseases: a meta-analysis. *Circulation* 2012;**126**(18):2177-83.
13. Dove MS, Dockery DW, Mittleman MA, et al. The impact of Massachusetts' smoke-free workplace laws on acute myocardial infarction deaths. *Am J Public Health* 2010;**100**(11):2206-12.
14. Rothwell PM. External validity of randomised controlled trials: "to whom do the results of this trial apply?". *Lancet* 2005;**365**(9453):82-93.
15. Ford ES, Ajani UA, Croft JB, et al. Explaining the decrease in U.S. deaths from coronary disease, 1980-2000. *N Engl J Med* 2007;**356**(23):2388-98.
16. Laatikainen T, Critchley J, Vartiainen E, et al. Explaining the decline in coronary heart disease mortality in Finland between 1982 and 1997. *Am J Epidemiol* 2005;**162**(8):764-73.

17. Capewell S, Beaglehole R, Seddon M, et al. Explanation for the decline in coronary heart disease mortality rates in Auckland, New Zealand, between 1982 and 1993. *Circulation* 2000;**102**(13):1511-6.
18. Unal B, Critchley JA, Capewell S. Explaining the decline in coronary heart disease mortality in England and Wales between 1981 and 2000. *Circulation* 2004;**109**(9):1101-7.
19. Bjorck L, Rosengren A, Bennett K, et al. Modelling the decreasing coronary heart disease mortality in Sweden between 1986 and 2002. *Eur Heart J* 2009;**30**(9):1046-56.
20. Palmieri L, Bennett K, Giampaoli S, et al. Explaining the decrease in coronary heart disease mortality in Italy between 1980 and 2000. *Am J Public Health* 2010;**100**(4):684-92.
21. Flores-Mateo G, Grau M, O'Flaherty M, et al. [Analyzing the coronary heart disease mortality decline in a Mediterranean population: Spain 1988-2005]. *Rev Esp Cardiol* 2011;**64**(11):988-96.
22. Yeh RW, Sidney S, Chandra M, et al. Population trends in the incidence and outcomes of acute myocardial infarction. *N Engl J Med* 2010;**362**(23):2155-65.
23. Chen J, Normand SL, Wang Y, et al. Recent declines in hospitalizations for acute myocardial infarction for Medicare fee-for-service beneficiaries: progress and continuing challenges. *Circulation* 2010;**121**(11):1322-8.
24. Barchielli A, Balzi D, Naldoni P, et al. Hospital discharge data for assessing myocardial infarction events and trends, and effects of diagnosis validation according to MONICA and AHA criteria. *J Epidemiol Community Health* 2012;**66**(5):462-7.
25. Briffa T, Nedkoff L, Peeters A, et al. Discordant age and sex-specific trends in the incidence of a first coronary heart disease event in Western Australia from 1996 to 2007. *Heart* 2011;**97**(5):400-4.
26. Shalev V, Goldshtein I, Porath A, et al. Continuation of statin therapy and primary prevention of nonfatal cardiovascular events. *Am J Cardiol* 2012;**110**(12):1779-86.
27. Agencia Española de Medicamentos y Productos Sanitarios. Informes del Observatorio de Uso de Medicamentos. Madrid: AEMPS Available from: URL: <http://www.aemps.gob.es/medicamentosUsoHumano/observatorio/informes.htm> (accessed 23 Aug. 2012).
28. Ministerio de Sanidad Política Social e Igualdad. Portal Estadístico del SNS. Madrid: MSSSI Available from: URL: <http://www.msssi.gob.es/estadEstudios/estadisticas/sisInfSanSNS/home.htm> (accessed 23 Aug. 2012).
29. R: A language and environment for statistical computing [computer program]. Version 2.15.0. Vienna, Austria: R Foundation for Statistical Computing; 2012.
30. Alpert JS, Thygesen K, Antman E, et al. Myocardial infarction redefined--a consensus document of The Joint European Society of Cardiology/American College of Cardiology Committee for the redefinition of myocardial infarction. *J Am Coll Cardiol* 2000;**36**(3):959-69.
31. Grau M, Elosua R, Cabrera de Leon A, et al. [Cardiovascular risk factors in Spain in the first decade of the 21st Century, a pooled analysis with individual data from 11 population-based studies: the DARIOS study]. *Rev Esp Cardiol* 2011;**64**(4):295-304.
32. Ministerio de Sanidad Política Social e Igualdad. Protección de la salud: tabaco. Legislación, índice cronológico. Madrid: MSSSI Available from: URL: <http://www.msssi.gob.es/ciudadanos/proteccionSalud/tabaco/legislacion.htm> (accessed 23 May 2013).
33. Villalbi JR, Sanchez E, Benet J, et al. The extension of smoke-free areas and acute myocardial infarction mortality: before and after study. *BMJ Open* 2011;**1**(1):e000067.

- 1  
2  
3  
4  
5  
6  
7  
8  
9  
10  
11  
12  
13  
14  
15  
16  
17  
18  
19  
20  
21  
22  
23  
24  
25  
26  
27  
28  
29  
30  
31  
32  
33  
34  
35  
36  
37  
38  
39  
40  
41  
42  
43  
44  
45  
46  
47  
48  
49  
50  
51  
52  
53  
54  
55  
56  
57  
58  
59  
60
34. Agüero F, Degano IR, Subirana I, et al. Impact of a partial smoke-free legislation on myocardial infarction incidence, mortality and case-fatality in a population-based registry: the REGICOR Study. *PLoS One* 2013;**8**(1):e53722.
  35. Redberg RF, Katz MH. Healthy men should not take statins. *JAMA* 2012;**307**(14):1491-2.
  36. Brugts JJ, Yetgin T, Hoeks SE, et al. The benefits of statins in people without established cardiovascular disease but with cardiovascular risk factors: meta-analysis of randomised controlled trials. *BMJ* 2009;**338**:b2376.
  37. Ray KK, Seshasai SR, Erqou S, et al. Statins and all-cause mortality in high-risk primary prevention: a meta-analysis of 11 randomized controlled trials involving 65,229 participants. *Arch Intern Med* 2010;**170**(12):1024-31.
  38. Taylor F, Ward K, Moore TH, et al. Statins for the primary prevention of cardiovascular disease. *Cochrane Database Syst Rev* 2011;(1):CD004816.
  39. Thavendiranathan P, Bagai A, Brookhart MA, et al. Primary prevention of cardiovascular diseases with statin therapy: a meta-analysis of randomized controlled trials. *Arch Intern Med* 2006;**166**(21):2307-13.
  40. Vrečer M, Turk S, Drinovec J, et al. Use of statins in primary and secondary prevention of coronary heart disease and ischemic stroke. Meta-analysis of randomized trials. *Int J Clin Pharmacol Ther* 2003;**41**(12):567-77.
  41. Ministerio de Sanidad Política Social e Igualdad. Economía del Medicamento y Productos Sanitarios. Madrid: MSSSI Available from: URL: <http://www.msssi.gob.es/profesionales/farmacia/legislacion/economia/home.htm> (accessed 26 May 2013).
  42. Aros F, Cunat J, Loma-Osorio A, et al. [Management of myocardial infarction in Spain in the year 2000. The PRIAMHO II study]. *Rev Esp Cardiol* 2003;**56**(12):1165-73.

1  
2  
3  
4  
5  
6  
7  
8  
9  
10  
11  
12  
13  
14  
15  
16  
17  
18  
19  
20  
21  
22  
23  
24  
25  
26  
27  
28  
29  
30  
31  
32  
33  
34  
35  
36  
37  
38  
39  
40  
41  
42  
43  
44  
45  
46  
47  
48  
49  
50  
51  
52  
53  
54  
55  
56  
57  
58  
59  
60

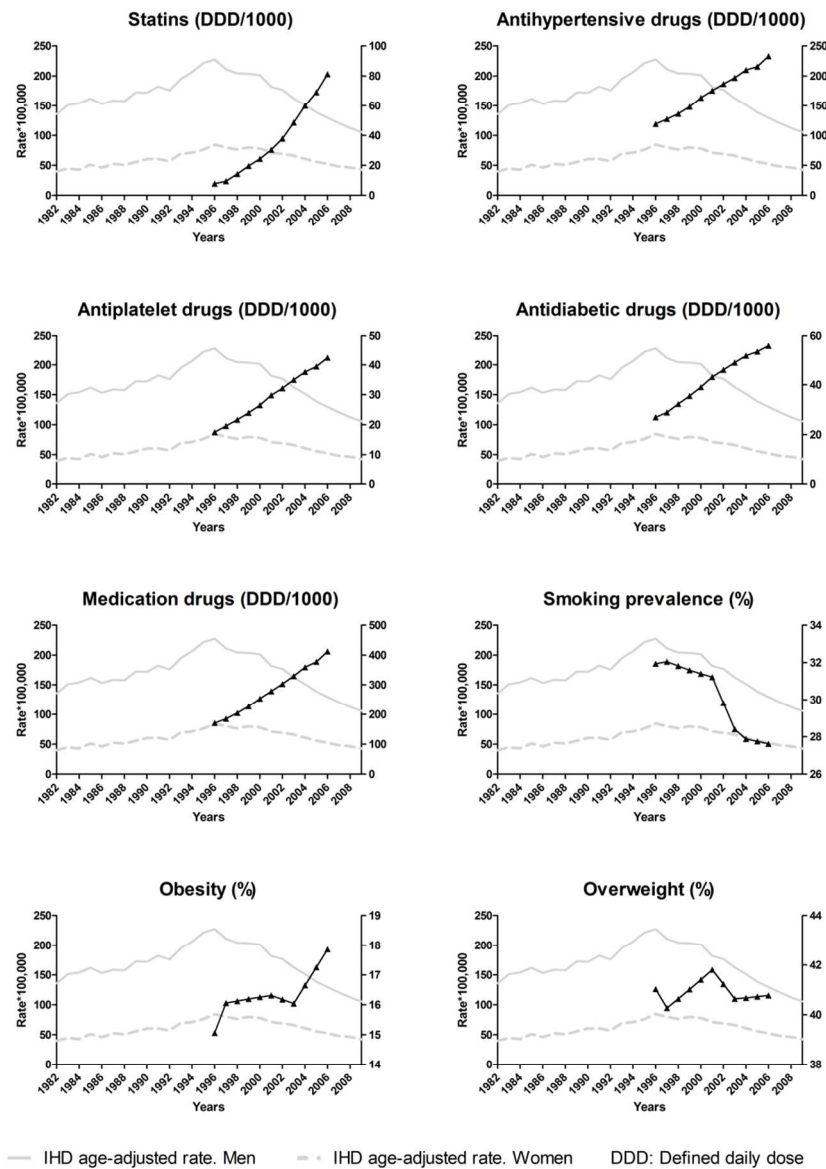

Figure 1. Annual trends in explanatory variables and incident ischaemic heart disease hospitalisation rates. 90x124mm (300 x 300 DPI)

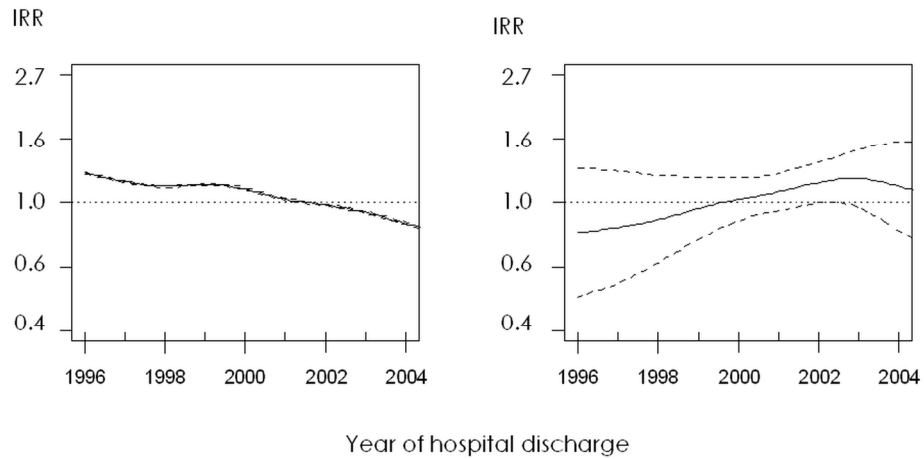

Figure 2. Time series of incidence analysed using non-parametric generalised additive models. Left plot: smoothed series adjusted for age and sex. Right plot: smoothed series adjusted for age, sex, prevalence of smoking, obesity and overweight, and use of cardiovascular disease prevention drug therapy.  
167x90mm (300 x 300 DPI)

review only

## TECHNICAL APPENDIX

1. THEORETICAL BASIS OF THE MATEMATICAL MODELS USED IN THE ANALYSES. Poisson regression. Mixed effects Poisson models. Generalized additive models. Recommended bibliography.
2. TECHNICAL DETAILS. Data file structure. Model syntax and outputs. Percentage of annual IHD rates variability explained by independent variables.
3. OTHER SUPPLEMENTARY MATERIALS. Identification of incident cases. Formula for the calculation of Number of Defined Daily Doses per 1000 population and per day.

## 1. THEORETICAL BASIS OF THE MATEMATICAL MODELS USED IN THE ANALYSES

## POISSON REGRESSION

Poisson regression models are a particular class of generalized lineal models that are commonly used for count data, that is, when the response variable is discrete taking non-negative integer values. Distribution of count data is typically a Poisson distribution. In our study the response variable is the count of cases discharged from hospitals with the diagnoses of incident IHD each year from 1996 to 2006.

It can be modelled that the response variable is a function of some explanatory variables. In our models, the count of IHD cases discharged each year from hospitals in Spain is modelled as varying in function of the age, sex, the proportion of smokers, obese and overweighted in the Spanish population in such year (and also 1, 2, and 3 years before to test the associations taking into account the possible latency between exposure and its effect), and of the prescription of drugs for vascular risk factors.

Regression coefficients and their confidence intervals for each of the explanatory variables reflect its effect on the response variable. It measures the change in the response variable for each unit change in the explanatory variables, given that the rest of explanatory variables remain constant. Exponentiation of regression coefficients gives the incident rate ratio (IRR) for each explanatory variable.

The number of incident IHD cases discharged from hospitals depends also on the size of the population, which is thus entered in the model and considered not as an explanatory variable (so it is not given a regression coefficient) but as the size of exposure. Due to the log link in Poisson regression, this is equivalent to having rates as the dependent variable (see below) and therefore, regression coefficients in the explanatory variables reflect their effect on incidence rates. As age and sex are included in the model, effect is measured as age and sex adjusted IRRs.

$$\log(n \text{ cases}) = \log(p \text{ population}) + \sum \beta(x);$$

$$\log(n \text{ cases}) - \log(p \text{ population}) = \sum \beta(x);$$

$$\log(n \text{ cases}/p \text{ population}) = \sum \beta(x).$$

In many occasions the dependent variable is not strictly Poisson, and in these situations there is variability in data that is not adequately captured by the model, which is called overdispersion of data. This has implications, among them that confidence intervals are erroneously narrow, and significance values are wrong. Also, when data are time series, there is autocorrelation and assumptions in the model are not fulfilled. There are several forms of correcting one or another of such errors; including the time variable (in our case year) as a random-effect variable in the model effectively corrects for both at the same time. This implies using a mixed fixed and random effects Poisson model. The command in Stata for these kind of models is 'xtmepoisson'.

#### MIXED EFFECTS POISSON MODELS

Mixed models are very valuable tools that have many applications in statistics and in epidemiology, such as analysis of repeated measures, meta-analysis, multicenter trials, matched case-control studies, geographical analysis, or multilevel/hierarchical analysis. The basic idea in these models is that the data are grouped in some way (same patient, same study, same centre, same case-control couple, same geographical unit, same level) that make the individual observations in each group sharing specific circumstances. In depth statistical characteristics and applications of these models are too extensive and lay out of the scope of this journal and its readers. However we include some bibliographical references in case someone is interested in their study.

#### GENERALIZED ADDITIVE MODELS

The primary restriction of a glm is the fact that it is a lineal model. The Generalized Additive Model (GAM) is an adaptation of generalized lineal model that allows nonlinear transformation of the input variables to be fit by the data. It extends the generalized lineal model by fitting nonparametric functions to estimate the relationship between the explanatory and the response variables. The nonparametric functions are estimated from the data using smoothing operations. GAM models further allows to graphically depict the relationship including both smoothing and also a non-parametric fit, with no a priori assumptions on the actual shape of the relationship between response and predictor. As time is used as the predictor, the result is a smoothed time series of the response.

1  
2  
3 GAM have been extensively used for dose-response relationship analysis, especially when this  
4 relationship is or may be non-linear, i.e, presence of cut-off values, saturation values or any  
5 kind of non-monotonous shape. In our study we have used GAM models to represent the  
6 change in the shape of the smoothed time series with and without including the explanatory  
7 variables.  
8

9  
10 We have used the command *gam* implemented in the *mgcv* library of the R statistical package.  
11

#### 12 13 14 RECOMMENDED BIBLIOGRAPHY

15  
16 Gelman A, Hill J. Data analysis using regression and multilevel/hierarchical models. Cambridge  
17 University Press. New York, 2007.

18  
19 MathSoft. S-Plus 4 Guide to Statistics. Data analysis products division. MathSoft. Seattle, 1997.  
20

21  
22 Brown H, Prescott R. Applied mixed models in medicine. John Wiley & Sons Ltd. Chichester,  
23 1999.

24  
25 Hastie T, Tibshirani R. Generalized additive models. *Statistical Science* 1986; 1: 297-318.  
26  
27  
28  
29  
30

#### 31 2. TECHNICAL DETAILS.

##### 32 33 DATA FILE STRUCTURE

34  
35 Derived from the pertinent medical records, data on every individual, anonymised hospital  
36 discharge due to this cause were drawn from official microfiches. From these, incident cases  
37 were selected. For modelling purposes, the count of incident cases was computed for each  
38 year, sex and age group. Parallel year, sex and age group data were obtained from official  
39 sources for population data and for the explanatory variables, resulting in a file with the  
40 structure shown in Table sup. 1.  
41

42  
43 An incident event was defined as that in which the following two conditions were fulfilled: a)  
44 diagnosis at discharge of acute IHD, acute myocardial infarction, intermediate coronary  
45 syndrome (unstable angina) or angina pectoris (ICD 410, 411 or 413); and, b) first admission  
46 due to IHD, as shown by a check for duplicate entries based on the fields, "sex", "date of birth"  
47 and "province of residence". Events for which control for duplicates could not be performed  
48 for lack of any record of the patient's complete date of birth (n= 91,176, 3.1%), were excluded.  
49

50  
51 The method used to control for duplicates was validated by comparing the results against data  
52 on 30,205 hospitalisations in eight cities for which patient identification codes were available,  
53 yielding a sensitivity of 97.88% and specificity of 88.73. The distribution by age, sex and  
54 diagnostic category of this validation sample did not differ from that of the study population.  
55 The results of these analyses are shown in tables sup. 2, 3 and 4.  
56  
57  
58  
59  
60



Table sup. 1. File structure

| Sex   | Year | Age     | Pop     | Cases | Smoking    |
|-------|------|---------|---------|-------|------------|
| Men   | 1996 | 30-34 y | 1586299 |       | 351 57.67  |
| Men   | 1996 | 35-39 y | 1450668 |       | 915 58.27  |
| Men   | 1996 | 40-44 y | 1274861 |       | 2015 58.27 |
| Men   | 1996 | 45-49 y | 1205540 |       | 3247 49.76 |
| Men   | 1996 | 50-54 y | 1090239 |       | 4056 49.76 |
| Men   | 1996 | 55-59 y | 935055  |       | 4785 40.03 |
| Men   | 1996 | 60-64 y | 1025528 |       | 6431 40.03 |
| Men   | 1996 | 65-69 y | 924165  |       | 8097 28.71 |
| Men   | 1996 | 70-74 y | 731542  |       | 6876 28.71 |
| Men   | 1996 | 75-79 y | 462032  |       | 4906 16.42 |
| Men   | 1996 | 80-84 y | 279073  |       | 3015 16.42 |
| Men   | 1996 | 85 + y  | 184300  |       | 1519 16.42 |
| Men   | 1997 | 30-34 y | 1606873 |       | 275 55.86  |
| Men   | 1997 | 35-39 y | 1484122 |       | 828 60.19  |
| Men   | 1997 | 40-44 y | 1306110 |       | 1570 60.19 |
| Men   | 2006 | 60-64 y | 1061310 |       | 3647 31.34 |
| Men   | 2006 | 65-69 y | 869044  |       | 3574 20.56 |
| Men   | 2006 | 70-74 y | 869815  |       | 4170 20.56 |
| Men   | 2006 | 75-79 y | 680368  |       | 3776 9.3   |
| Men   | 2006 | 80-84 y | 428671  |       | 2977 9.3   |
| Men   | 2006 | 85 + y  | 265248  |       | 1982 9.3   |
| Women | 1996 | 30-34 y | 1561500 |       | 121 53.38  |
| Women | 1996 | 35-39 y | 1448200 |       | 217 36.54  |
| Women | 1996 | 40-44 y | 1277497 |       | 350 36.54  |
| Women | 1996 | 45-49 y | 1218406 |       | 682 17.64  |
| Women | 1996 | 50-54 y | 1116991 |       | 983 17.64  |
| Women | 1996 | 55-59 y | 989781  |       | 1455 7.01  |
| Women | 1996 | 60-64 y | 1124800 |       | 2616 7.01  |
| Women | 1996 | 65-69 y | 1068123 |       | 3461 2.00  |
| Women | 1996 | 70-74 y | 925186  |       | 4239 2.00  |
| Women | 1996 | 75-79 y | 695034  |       | 4222 .92   |
| Women | 1996 | 80-84 y | 501698  |       | 2931 .92   |
| Women | 1996 | 85 + y  | 406709  |       | 2368 .92   |
| Women | 1997 | 30-34 y | 1580205 |       | 67 54.85   |
| Women | 1997 | 35-39 y | 1480723 |       | 111 37.48  |
| Women | 1997 | 40-44 y | 1310445 |       | 276 37.48  |
| Women | 2006 | 85 + y  | 587440  |       | 3205 1.49  |

## MODELS SINTAX AND OUTPUTS

## MODELS IN TABLE 2 OF THE ARTICLE.

Effect of prevalence of smoking habit, obesity, overweight and use of cardiovascular disease prevention drug therapy on incident ischaemic heart disease hospitalisation rates on annual incident ischaemic heart disease hospitalisation rates 1996-2006. Models for exposure-effect lags of 0, 1, 2 and 3 years.

## Section 1. Adjustment for age, sex, year (random variable) and specified variables

## Syntax:

```
xtmepoisson incidentes grupoedad sexo fuma obes sobrepeso medicomb10, exposure(pob) ||
año:, covariance(independent) irr
```

## LAG0

| incidentes | IRR      | Std. Err.  | z       | P> z  | [95% Conf. Interval] |          |
|------------|----------|------------|---------|-------|----------------------|----------|
| grupoedad  | 1.392495 | .0016029   | 287.63  | 0.000 | 1.389357             | 1.39564  |
| sexo       | .6927362 | .006319    | -40.25  | 0.000 | .6804613             | .7052325 |
| fuma       | 1.014939 | .0002595   | 57.99   | 0.000 | 1.01443              | 1.015448 |
| obes       | 1.044838 | .0005036   | 91.00   | 0.000 | 1.043851             | 1.045825 |
| sobrepeso  | 1.041036 | .0004449   | 94.10   | 0.000 | 1.040165             | 1.041909 |
| medicomb10 | .9737405 | .0011353   | -22.82  | 0.000 | .9715179             | .9759681 |
| _cons      | 6.33e-06 | 3.41e-07   | -222.21 | 0.000 | 5.70e-06             | 7.04e-06 |
| ln(pob)    | 1        | (exposure) |         |       |                      |          |

## LAG1

| incidentes | IRR      | Std. Err. | z      | P> z  | [95% Conf. Interval] |          |
|------------|----------|-----------|--------|-------|----------------------|----------|
| grupoedad  | 1.399234 | .0017278  | 272.05 | 0.000 | 1.395852             | 1.402624 |
| sexo       | .6640241 | .0066417  | -40.93 | 0.000 | .6511333             | .67717   |
| fumalag1   | 1.015785 | .0002767  | 57.50  | 0.000 | 1.015243             | 1.016327 |

|                |  |          |            |         |       |          |          |
|----------------|--|----------|------------|---------|-------|----------|----------|
| obeslag1       |  | 1.049157 | .0005648   | 89.14   | 0.000 | 1.048051 | 1.050265 |
| sobrepesolag1  |  | 1.037582 | .0004643   | 82.44   | 0.000 | 1.036673 | 1.038493 |
| medicomb10lag1 |  | .9722693 | .001042    | -26.24  | 0.000 | .9702293 | .9743137 |
| _cons          |  | 6.60e-06 | 3.54e-07   | -222.11 | 0.000 | 5.94e-06 | 7.33e-06 |
| ln(pob)        |  | 1        | (exposure) |         |       |          |          |

**LAG2**

| incidentes     |  | IRR      | Std. Err.  | z       | P> z  | [95% Conf. Interval] |
|----------------|--|----------|------------|---------|-------|----------------------|
| grupoedad      |  | 1.401669 | .001869    | 253.23  | 0.000 | 1.39801 1.405337     |
| sexo           |  | .6287316 | .0070053   | -41.65  | 0.000 | .6151503 .6426126    |
| fumalag2       |  | 1.01591  | .0002953   | 54.31   | 0.000 | 1.015332 1.016489    |
| obeslag2       |  | 1.052288 | .0006391   | 83.92   | 0.000 | 1.051036 1.053542    |
| sobrepesolag2  |  | 1.034201 | .0004911   | 70.82   | 0.000 | 1.033239 1.035164    |
| medicomb10lag2 |  | .9701146 | .0009521   | -30.91  | 0.000 | .9682502 .9719826    |
| _cons          |  | 7.69e-06 | 4.21e-07   | -215.03 | 0.000 | 6.91e-06 8.56e-06    |
| ln(pob)        |  | 1        | (exposure) |         |       |                      |

**LAG3**

| incidentes     |  | IRR      | Std. Err.  | z       | P> z  | [95% Conf. Interval] |
|----------------|--|----------|------------|---------|-------|----------------------|
| grupoedad      |  | 1.402652 | .0020482   | 231.72  | 0.000 | 1.398644 1.406672    |
| sexo           |  | .5972099 | .0076339   | -40.33  | 0.000 | .5824336 .6123611    |
| fumalag3       |  | 1.015794 | .0003173   | 50.17   | 0.000 | 1.015172 1.016416    |
| obeslag3       |  | 1.055649 | .0007405   | 77.21   | 0.000 | 1.054199 1.057101    |
| sobrepesolag3  |  | 1.031841 | .0005373   | 60.20   | 0.000 | 1.030789 1.032895    |
| medicomb10lag3 |  | .9654728 | .0016614   | -20.42  | 0.000 | .9622219 .9687347    |
| _cons          |  | 9.13e-06 | 6.23e-07   | -170.13 | 0.000 | 7.99e-06 .0000104    |
| ln(pob)        |  | 1        | (exposure) |         |       |                      |

Section 1. Separate analysis for each type of drug. Adjustment for age, sex, year (random variable) and specified variables.

For brevity reasons, only models for statins and antihypertensive drugs and no exposure-effect lag are presented.

Syntax:

```
xmepoisson incidentes grupoedad sexo fuma obes sobrepeso estatinas10, exposure(pob) ||
año:, covariance(independent) irr
```

| incidentes  | IRR          | Std. Err. | z       | P> z  | [95% Conf. Interval] |          |
|-------------|--------------|-----------|---------|-------|----------------------|----------|
| grupoedad   | 1.392497     | .001603   | 287.62  | 0.000 | 1.389359             | 1.395642 |
| sexo        | .692355      | .0063155  | -40.31  | 0.000 | .6800869             | .7048444 |
| fuma        | 1.014943     | .0002595  | 58.01   | 0.000 | 1.014434             | 1.015452 |
| obes        | 1.044875     | .0005034  | 91.11   | 0.000 | 1.043889             | 1.045862 |
| sobrepeso   | 1.040998     | .0004448  | 94.04   | 0.000 | 1.040126             | 1.04187  |
| estatinas10 | .9178191     | .00416    | -18.92  | 0.000 | .9097017             | .9260089 |
| _cons       | 4.10e-06     | 1.88e-07  | -271.02 | 0.000 | 3.75e-06             | 4.48e-06 |
| ln(pob)     | 1 (exposure) |           |         |       |                      |          |

```
xmepoisson incidentes grupoedad sexo fuma obes sobrepeso hipotensores10, exposure(pob)
|| año:, covariance(independent) irr
```

| incidentes     | IRR          | Std. Err. | z       | P> z  | [95% Conf. Interval] |          |
|----------------|--------------|-----------|---------|-------|----------------------|----------|
| grupoedad      | 1.392514     | .0016029  | 287.66  | 0.000 | 1.389376             | 1.39566  |
| sexo           | .692778      | .0063204  | -40.23  | 0.000 | .6805003             | .7052772 |
| fuma           | 1.014943     | .0002595  | 58.01   | 0.000 | 1.014434             | 1.015451 |
| obes           | 1.044842     | .0005036  | 91.00   | 0.000 | 1.043855             | 1.04583  |
| sobrepeso      | 1.041037     | .000445   | 94.08   | 0.000 | 1.040165             | 1.04191  |
| hipotensores10 | .9450681     | .0027863  | -19.16  | 0.000 | .9396227             | .9505451 |
| _cons          | 7.98e-06     | 5.36e-07  | -174.96 | 0.000 | 7.00e-06             | 9.11e-06 |
| ln(pob)        | 1 (exposure) |           |         |       |                      |          |

## MODELS IN TABLE 3 OF THE ARTICLE.

Dose-response analysis of the effect of prevalence of smoking habit, obesity, overweight and use of cardiovascular disease prevention drug therapy on incident ischaemic heart disease hospitalisation rates.

In these models the explanatory variables were categorised in quartiles and entered in the models as factor variables. P-value for linear trend was calculated by entering categories in the continuous scale.

For brevity reasons, only models for drug use (combined) and no exposure-effect lag are presented.

Syntax:

```
xtmepoisson incidentes grupoedad sexo fuma obes sobrepeso i.qmedicomb10, exposure(pob)
|| año:, covariance(independent) irr
```

| incidentes  | IRR      | Std. Err.  | z       | P> z  | [95% Conf. Interval] |          |
|-------------|----------|------------|---------|-------|----------------------|----------|
| grupoedad   | 1.39253  | .0016032   | 287.62  | 0.000 | 1.389391             | 1.395675 |
| sexo        | .6924933 | .0063185   | -40.27  | 0.000 | .6802195             | .7049887 |
| fuma        | 1.014948 | .0002596   | 58.02   | 0.000 | 1.01444              | 1.015457 |
| obes        | 1.044876 | .0005036   | 91.08   | 0.000 | 1.043889             | 1.045863 |
| sobrepeso   | 1.041006 | .000445    | 94.01   | 0.000 | 1.040134             | 1.041879 |
|             |          |            |         |       |                      |          |
| qmedicomb10 |          |            |         |       |                      |          |
| 2           | .8451142 | .0432436   | -3.29   | 0.001 | .7644698             | .9342658 |
| 3           | .7149764 | .0365935   | -6.56   | 0.000 | .6467344             | .7904191 |
| 4           | .5650465 | .0323431   | -9.97   | 0.000 | .5050818             | .6321305 |
|             |          |            |         |       |                      |          |
| _cons       | 3.81e-06 | 2.08e-07   | -228.19 | 0.000 | 3.42e-06             | 4.24e-06 |
| ln(pob)     | 1        | (exposure) |         |       |                      |          |

1  
2  
3  
4  
5  
6  
7  
8  
9  
10  
11  
12  
13  
14  
15  
16  
17  
18  
19  
20  
21  
22  
23  
24  
25  
26  
27  
28  
29  
30  
31  
32  
33  
34  
35  
36  
37  
38  
39  
40  
41  
42  
43  
44  
45  
46  
47  
48  
49  
50  
51  
52  
53  
54  
55  
56  
57  
58  
59  
60

### CORRELATION ANALYSIS BETWEEN DRUG TYPES

Syntax:

```
. pwcorr estatinas hipotensores antiagreg antidiab, sig
```

|              | estatinas | hipotensores | antiagreg | antidiab |
|--------------|-----------|--------------|-----------|----------|
| estatinas    | 1.0000    |              |           |          |
| hipotensores | 0.9782    | 1.0000       |           |          |
| antiagreg    | 0.9820    | 0.9990       | 1.0000    |          |
| antidiab     | 0.9647    | 0.9968       | 0.9966    | 1.0000   |

For peer review only

## GAM MODELS USED IN FIGURE 2. Syntax and output in R statistical package

Syntax:

```

isquemia.data<- read.table("C:este.dat ", header=TRUE, sep="\t", fill=TRUE)

library(mgcv)
par(mfrow=c(2,2))

gamincidentes<-gam(incidentes~offset(log(pob)) + sexo + grupoedad + s(año),
family=poisson, data=isquemia.data)
plot(gamincidentes, ylim=c(-1,1))
abline(h=0, lty=3)

gamincidentes<-gam(incidentes~offset(log(pob)) + sexo + grupoedad + s(año)+
sobrepeso+obes+ fuma+estatinas+hipotensores+antiagreg+antidiab, family=poisson,
data=isquemia.data)

plot(gamincidentes, ylim=c(-1,1))
abline(h=0, lty=3)

```

Output:

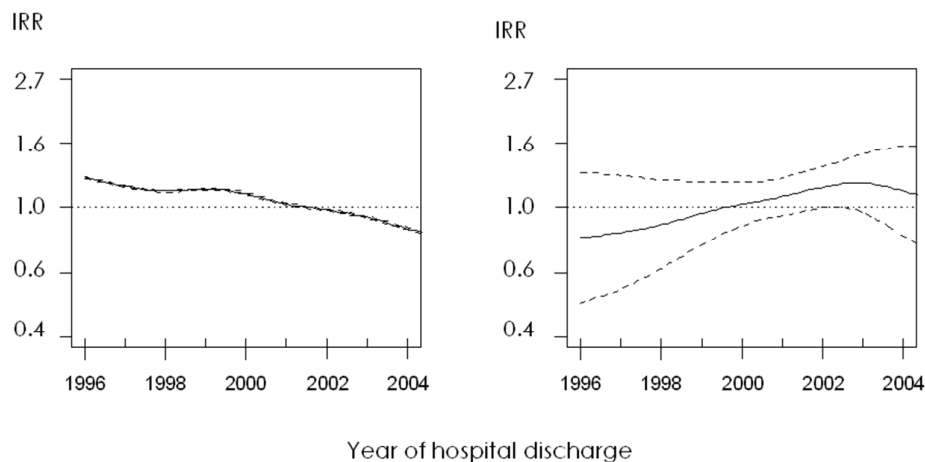

MODELS USED TO MEASURE THE INTERANNUAL VARIABILITY EXPLAINED BY THE INDEPENDENT VARIABLES

- Model 1: variance of the random term in the complete model.

```
xtmepoisson incidentes grupoedad sexo fuma obes sobrepeso medicomb10, exposure(pob) ||
año:, covariance(independent) irr variance
```

| Random-effects Parameters | Estimate | Std. Err. | [95% Conf. Interval] |          |
|---------------------------|----------|-----------|----------------------|----------|
| año: Identity             |          |           |                      |          |
| var(_cons)                | .0008784 | .0003821  | .0003745             | .0020605 |

- Model 2: variance of the random term in the model adjusted for age and sex.

```
xtmepoisson incidentes grupoedad sexo, exposure(pob) || año:, covariance(independent)
irr variance
```

| Random-effects Parameters | Estimate | Std. Err. | [95% Conf. Interval] |          |
|---------------------------|----------|-----------|----------------------|----------|
| año: Identity             |          |           |                      |          |
| var(_cons)                | .0291142 | .0124213  | .0126168             | .0671833 |

- Calculation of interannual variability explained by the independent variables

$$1 - (\text{var model 1} / \text{var model 2}) = 1 - (.0008784 / .0291142) = 0.97$$



## OTHER SUPPLEMENTARY MATERIALS.

## IDENTIFICATION OF INCIDENT CASES. VALIDATION ANALYSIS

Table suppl. 2. Sensitivity and especificity compared with detection by personal code.

|                                                 |                 | Identification by personal code |              |        |        |       |
|-------------------------------------------------|-----------------|---------------------------------|--------------|--------|--------|-------|
|                                                 |                 | Duplicated case                 | Primary case | Total  | SE     | ES    |
| Identification by sex, birth date and residence |                 |                                 |              |        |        |       |
| City 1                                          | Duplicated case | 698                             | 135          | 833    |        |       |
|                                                 | Primary case    | 13                              | 2,612        | 2,625  |        |       |
|                                                 | Total           | 711                             | 2,747        | 3,458  | 98.17  | 95.08 |
| City 2                                          | Duplicated case | 816                             | 242          | 1,058  |        |       |
|                                                 | Primary case    | 21                              | 2,890        | 2,911  |        |       |
|                                                 | Total           | 837                             | 3,132        | 3,969  | 97.50  | 92.96 |
| City 3                                          | Duplicated case | 2,923                           | 1,752        | 4,675  |        |       |
|                                                 | Primary case    | 87                              | 7,672        | 7,759  |        |       |
|                                                 | Total           | 3,010                           | 9,424        | 12,434 | 97.10  | 81.40 |
| City 4                                          | Duplicated case | 1,031                           | 311          | 1,342  |        |       |
|                                                 | Primary case    | 0                               | 3,730        | 3,730  |        |       |
|                                                 | Total           | 1,031                           | 4,041        | 5,072  | 100.00 | 92.30 |
| City 5                                          | Duplicated case | 682                             | 211          | 893    |        |       |
|                                                 | Primary case    | 5                               | 2,907        | 2,912  |        |       |
|                                                 | Total           | 687                             | 3,118        | 3,805  | 99.56  | 93.23 |
| City 6                                          | Duplicated case | 58                              | 7            | 65     |        |       |
|                                                 | Primary case    | 1                               | 379          | 380    |        |       |
|                                                 | Total           | 59                              | 386          | 445    | 98.30  | 98.19 |
| City 7                                          | Duplicated case | 45                              | 21           | 66     |        |       |
|                                                 | Primary case    | 9                               | 573          | 582    |        |       |
|                                                 | Total           | 54                              | 594          | 648    | 83.33  | 96.46 |
| City 8                                          | Duplicated case | 35                              | 2            | 37     |        |       |
|                                                 | Primary case    | 0                               | 337          | 337    |        |       |
|                                                 | Total           | 35                              | 339          | 374    | 100.00 | 99.41 |
| TOTAL                                           | Duplicated case | 6,288                           | 2,681        | 8,969  |        |       |
|                                                 | Primary case    | 136                             | 21,100       | 21,236 |        |       |
|                                                 | Total           | 6,424                           | 23,781       | 30,205 | 97.88  | 88.73 |

Table suppl. 3. Age and sex distribution in validation sample

|           |       | Men            | Women        | Total          |
|-----------|-------|----------------|--------------|----------------|
|           |       | 18,622 (65.8%) | 9,663 (34%)  | 28,285 (100.0) |
|           |       | n (%)          | n (%)        | n (%)          |
| Age group | 30-44 | 971 (5.2)      | 156 (1.6)    | 1,127 (4.0)    |
|           | 45-59 | 4,967 (26.7)   | 1,139 (11.8) | 6,106 (21.6)   |
|           | 60-74 | 7,878 (42.3)   | 3,491 (36.1) | 11,369 (40.2)  |
|           | 75 +  | 4,806 (25.8)   | 4,877 (50.5) | 9,683 (34.2)   |

Table suppl. 4. Sex and diagnostic group (CIE9-MC) distribution in validation simple.

|                 | Men          | Women        | Total         |
|-----------------|--------------|--------------|---------------|
|                 | n (%)        | n (%)        | N (%)         |
| Diagnostic code |              |              |               |
| 410             | 9,244 (49.6) | 4,711 (48.8) | 13,955 (49.3) |
| 411             | 2,584 (13.9) | 1,815 (18.8) | 4,399 (15.6)  |
| 413             | 1,607 (8.6)  | 1,433 (14.8) | 3,040 (10.7)  |
| 414             | 5,186 (27.9) | 1,704 (17.6) | 6,890 (24.4)  |

1  
2  
3 FORMULA FOR THE CALCULATION OF NUMBER OF DEFINED DAILY DOSES  
4 PER 1000 POPULATION AND PER DAY  
5  
6  
7  
8  
9

$$\text{DHD} = \frac{\text{NP} \times \text{PP} \times \text{Q} \times 1000}{\text{DDD} \times \text{N inhabitants} \times 365 \text{ days}}$$

17  
18 Where

- 19
- 20 • NP= Number of packs sold
- 21
- 22 • PP= Number of pills per pack
- 23
- 24 • Q= Quantity of drug per pill
- 25

26 DDD= Daily Defined Dose  
27  
28  
29  
30  
31  
32  
33  
34  
35  
36  
37  
38  
39  
40  
41  
42  
43  
44  
45  
46  
47  
48  
49  
50  
51  
52  
53  
54  
55  
56  
57  
58  
59  
60
